1 **The narrow-spectrum anthelmintic oxantel is a potent agonist of a novel acetylcholine**  
2 **receptor subtype in whipworms**

3

4 Tina V. A. Hansen<sup>1,2\*</sup>, Susanna Cirera<sup>1</sup>, Cédric Neveu<sup>2</sup>, Kirstine Calloe<sup>1</sup>, Dan A. Klaerke<sup>1\*</sup> and  
5 Richard J Martin<sup>3</sup>

6

7 <sup>1</sup>Department of Veterinary and Animal Sciences, Faculty of Health and Medical Sciences,  
8 University of Copenhagen, Dyrlægevej 100, 1870 Frederiksberg C, Denmark.

9 <sup>2</sup>INRAE, UMR Infectiologie et Santé Publique, Nouzilly, France.

10 <sup>3</sup>Department of Biomedical Sciences, College of Veterinary Medicine, Iowa State University,  
11 Ames, IA, USA.

12

13 \* [alstrup@sund.ku.dk](mailto:alstrup@sund.ku.dk), [dk@sund.ku.dk](mailto:dk@sund.ku.dk)

14

15 **Abstract**

16 In the absence of efficient alternative strategies, the control of parasitic nematodes, impacting  
17 human and animal health, mainly relies on the use of broad-spectrum anthelmintic compounds.

18 Unfortunately, most of these drugs have a limited single-dose efficacy against infections caused by  
19 the whipworm, *Trichuris*. These infections are of both human and veterinarian importance.

20 However, in contrast to a wide range of parasitic nematode species, the narrow-spectrum  
21 anthelmintic oxantel has a high efficacy on *Trichuris spp.* Despite this knowledge, the molecular  
22 target(s) of oxantel within *Trichuris* is still unknown. In the distantly related pig roundworm,

23 *Ascaris suum*, oxantel has a small, but significant effect on the recombinant homomeric Nicotine-

24 sensitive ionotropic acetylcholine receptor (*N*-AChR) made up of five ACR-16 subunits. Therefore,

25 we hypothesized that in whipworms, a putative homolog of an ACR-16 subunit, can form a  
26 functional oxantel-sensitive receptor. Using the pig whipworm *T. suis* as a model, we identified and  
27 cloned a novel ACR-16-like receptor subunit and successfully expressed the corresponding  
28 homomeric channel in *Xenopus laevis* oocytes. Electrophysiological experiments revealed this  
29 receptor to have distinctive pharmacological properties with oxantel acting as a full agonist, hence  
30 we refer to the receptor as an *O*-AChR subtype. Pyrantel activated this novel *O*-AChR subtype  
31 moderately, whereas classic nicotinic agonists surprisingly resulted in only minor responses. We  
32 demonstrated that the novel *Tsu*-ACR-16-like receptor is indeed a target for oxantel and is more  
33 responsive to oxantel than the ACR-16 receptor from *A. suum*. These finding most likely explain  
34 the high sensitivity of whipworms to oxantel, and highlights the importance of the discovery of  
35 additional distinct receptor subunit types within *Trichuris* that can be used as valuable screening  
36 tools to evaluate the effect of new synthetic or natural anthelmintic compounds.

37

### 38 **Author Summary**

39 The human whipworm, *Trichuris trichiura*, is an intestinal parasitic nematode infecting  
40 approximately 289.6 million people globally, primarily children living in developing countries.  
41 Chronic *T. trichiura* infection may cause dysentery, growth stunting and decreased cognitive  
42 performance. Whipworm infections are notoriously difficult to control with most available  
43 anthelmintics, including those commonly used in mass drug administration programs. Recently  
44 performed randomised controlled trials with whipworm-infected humans, have reported superior  
45 efficacies of oxantel, a classic, narrow-spectrum anthelmintic, developed for the treatment of  
46 *Trichuris* infections. Despite this knowledge, the molecular target(s) of oxantel within the  
47 whipworm has not been identified. In this study, we used the whipworm from pigs as a model and  
48 identified a receptor, which was explored using the *Xenopus* oocyte expression system. We

49 demonstrated that this receptor is highly responsive to oxantel, and therefore a major target of  
50 oxantel within *Trichuris*. In addition, we discovered that this receptor-type is distinctive and only  
51 present in the ancient group of parasitic nematodes, Clade I, which also includes the important  
52 zoonotic parasite *Trichinella*. Our findings, explain the specific mode of action of oxantel and open  
53 the way for additional characterization of similar receptor subtypes in other medically or veterinary  
54 important parasitic nematodes of Clade I.

55

## 56 **1. Introduction**

57 The human whipworm, *Trichuris trichiura*, is a Clade I parasitic nematode [1] and one of the Soil  
58 Transmitted Helminths (STHs) that is estimated to infect 289.6 million people globally, primarily  
59 those living in the tropics and subtropics [2]. Trichuriasis is rarely fatal, but chronically affects the  
60 health and nutritional status of the host [3,4], and is known to be notoriously difficult to treat using  
61 current anthelmintic drugs (e.g. albendazole and mebendazole) [5–12]. The extensive use of  
62 anthelmintics in livestock has led to widespread anthelmintic resistance (AR) to all the major drug  
63 classes [13]. Therefore AR in human parasitic nematodes is a concern where decreased susceptibility  
64 to albendazole has already been reported for both *T. trichiura* [14] and the human roundworm, *Ascaris*  
65 *lumbricoides* [15].

66 Oxantel, is a cholinergic agonist [16], and a *m*-oxyphenol analogue of pyrantel which was developed  
67 in 1972 [17] and marketed as a veterinary anthelmintic in 1974 for the treatment of *Trichuris* [18].  
68 Early clinical trials reported oxantel to be effective against *T. trichiura* infections [19,20] and recent  
69 studies show that oxantel is superior to single-dose albendazole and mebendazole [21,22], which are  
70 currently recommended by the WHO for the control of STHs [23]. Cholinergic agonists [16] exert  
71 their effect by paralyzing the worms, which are subsequently killed or expelled from the host [24].  
72 This effect is mediated by nicotinic acetylcholine receptors (nAChRs) [24] that are either heteromeric

73 or homomeric five-subunit ligand-gated ion channels expressed in neuronal, muscle and non-neuronal  
74 cell membranes [25,26]. nAChRs of parasitic nematodes have been separated into different  
75 pharmacological subtypes based on their sensitivities to a range of cholinergic anthelmintics. Patch-  
76 clamp recordings of muscle cells isolated from the pig roundworm *A. suum*, have revealed that their  
77 muscle nAChRs are preferentially activated either by levamisole (L), nicotine (N) or buprenorphine (B),  
78 and correspondingly are described as *L*-, *N*-, and *B*- AChRs subtypes [27]. Oxantel is classified as  
79 an agonist which is selective for the *N*-AChR subtypes [16]. The *N*-AChR subtypes from the model  
80 nematode *Caenorhabditis elegans* and the distantly related pig parasite *A. suum* are homomeric  
81 receptors made of the ACR-16 subunits [28,29]. Both of these ACR-16 receptors have a low, but  
82 significant sensitivity to oxantel [29,30].

83 The high sensitivity of *Trichuris* spp. to oxantel has previously been speculated to be due to an  
84 nAChR subtype present in *Trichuris* spp. that differs from nAChRs present in other intestinal parasitic  
85 nematodes [16]; we hypothesized that a potential homolog of ACR-16 in *Trichuris* could be a target  
86 of oxantel within this species.

87 Here we describe the functional characterization of a novel AChR subtype from the pig whipworm  
88 *T. suis* with a high sensitivity to oxantel and distinctive pharmacological properties. This homomeric  
89 receptor, referred to as an *O*-AChR subtype, is made of a divergent subunit specific to Clade I  
90 nematode species that is only distantly related to ACR-16 from nematode species belonging to other  
91 clades. Our results provide new insights about the mode of action of oxantel, its high efficacy on  
92 whipworms, and the divergent anthelmintic sensitivity of whipworms.

93

## 94 **2. Results**

95 *2.1. Identification of T. suis sequences related to the ACR-16 group.*

96 Using the *C. elegans* ACR-16 deduced amino-acid sequences as a query, tBLASTn search against *T.*  
97 *suis*, *T. muris* and *T. trichiura* genomic data available in WormBase-ParaSite (version WBPS14;  
98 <http://parasite.wormbase.org/>) allowed the identification of two distinct hits for each species sharing  
99 identities ranging from 46% to 47% with the *C. elegans* sequence. Subsequently, a second tBLASTn  
100 search against nematodes genomic data available at the NCBI was performed with the retrieved  
101 *Trichuris* spp. sequences. Homologies could be identified with either of the *acr-16* or *acr-19* genes  
102 from nematode species representative from the nematoda phylum. Using a panel of representative *C.*  
103 *elegans* nAChRs subunits as reference, a phylogenetic analysis including the *Trichuris* spp. and their  
104 putative homologs in the closely related species *Trichinella spiralis* was carried out (Fig. 1). *Trichuris*  
105 spp. sequences were found to form two distinct clusters. The first one presented a clear orthologous  
106 relationship with ACR-19, the second one clustered apart from the other subunits and belonged to the  
107 ACR-16 group [31]. An additional analysis, including other related sequences from nematode species  
108 representative from the different clades of the nematoda phylum (Suppl. Fig. 1) further confirmed  
109 that Clade I nematode species (including *Trichuris* spp.) possess a divergent group of AChR subunit  
110 related to the ACR-16 subunit. Consequently, the corresponding sequences from Clade I nematode  
111 species were named ACR-16-like.

112

## 113 *2.2 Molecular cloning of the Tsu-acr-16-like coding sequence.*

114 In the present study, based on the current knowledge of the original mode of action of oxantel [16,29],  
115 we hypothesized that the divergent ACR-16-like from *Trichuris* spp. could represent a preferential  
116 target for this narrow-spectrum anthelmintic. Using *T. suis* as a model, we cloned its *acr-16-like* full-  
117 length cDNA sequence as a matter of priority and deposited the sequence in GenBank under the  
118 accession number MT386096. An alignment of the *Tsu*-ACR-16-like sequence with its closely related  
119 counterparts from *T. muris*, *T. trichiura*, *T. spiralis* and *C. elegans* is provided in Fig. 2. The *Tsu*-

120 ACR-16-like subunit was found to share typical features of nAChR subunits including a predicted  
121 signal peptide, a Cys-loop motif, four transmembrane regions (TM1-TM4), and the YxCC motif  
122 which characterize an  $\alpha$ -type nAChR receptor subunit.

123

124 *2.2. Tsu-ACR-16-like subunits form a functional homomeric receptor when co-expressed with the*  
125 *ancillary protein RIC-3 in the Xenopus laevis oocyte.*

126 Previous studies have shown that *Cel-ACR-16* and *Asu-ACR-16* can form functional homomeric  
127 receptors when expressed in *X. laevis* oocytes with the ancillary protein RIC-3 [29,32]. Thus, we  
128 explored the requirement of RIC-3 for optimizing the putative functional expression of *Tsu-acr-16-*  
129 *like* cRNA in *X. laevis* oocytes. *Xenopus laevis* oocytes were micro injected with *Tsu-acr-16-like*  
130 cRNA in combination with *Asu-ric-3* or *Xle-ric-3* cRNA. *Tsu-acr-16-like* cRNA or *Asu-ric-3* cRNA  
131 alone as well as non-injected oocytes were used as controls.

132 The combination of *Tsu-acr-16-like* and *Asu-ric-3* or *Tsu-acr-16-like* and *Xle-ric-3* cRNAs led to  
133 robust expression of functional receptors responding to 100  $\mu$ M ACh, which elicited inward currents  
134 in the  $\mu$ A range (Fig. 3). The largest currents were measured in oocytes co-injected with *Tsu-acr-16-*  
135 *like* and *Asu-ric-3* cRNA (mean  $\pm$  SEM,  $7.54 \pm 0.74$ ,  $\mu$ A,  $n=32$ , data not shown); subsequently all  
136 other responses were normalized to this. Oocytes co-injection with *Tsu-acr-16-like* and *Xle-ric-3*  
137 cRNA resulted in relatively high current responses (mean  $\pm$  SEM,  $5.0 \pm 0.72$   $\mu$ A,  $n=6$ , data not  
138 shown), but oocytes injected with this cRNA combination degraded faster than oocytes injected with  
139 *Tsu-acr-16-like* and *Asu-ric-3* cRNA (data not shown). Non-injected oocytes, or oocytes injected with  
140 either *Tsu-acr-16-like* or *Asu-ric-3* cRNA alone, did not respond to 100  $\mu$ M ACh, highlighting the  
141 need of RIC-3 for the functional expression of the homomeric *Tsu-ACR-16-like* receptor.  
142 Representative traces of the inward currents for each injection type, and a bar chart presenting their

143 mean  $\pm$  SEM normalized values are shown in Fig. 3. Based on these results, all subsequent recordings  
144 were performed on oocytes co-injected with *Tsu-acr-16-like* and *Asu-ric-3* cRNAs.

145

### 146 2.3. Oxantel is a potent agonist on the *Tsu-ACR-16-like* receptor.

147 To explore the effect of oxantel and perform a detailed pharmacological characterization of the *Tsu-*  
148 *ACR-16-like* receptor, we used 4 cholinergic anthelmintics (i.e. oxantel, pyrantel, morantel and  
149 levamisole) and 5 nAChR agonists (i.e. epibatidine, nicotine, 3-bromocytisine, DMPP and cytosine).

150 Fig. 4 shows the rank order potency series of these drugs, representative traces of the inward currents  
151 induced by each of them, the number of oocytes (*n*) used for each agonist, along with a bar chart  
152 presenting the normalized mean  $\pm$  SEM for each drug group. Oxantel was the most potent agonist on  
153 the *Tsu-ACR-16-like* receptor and induced a current response even higher than the control response  
154 of 100  $\mu$ M ACh. Pyrantel also induced a relatively high current response, however, the nicotinic  
155 agonists: epibatidine, nicotine, 3-bromocytisine, DMPP and cytosine as well as the cholinergic  
156 anthelmintics, morantel and levamisole, were the least potent. The rank order potency series for the  
157 agonist drugs on the *Tsu-ACR-16-like* receptor when normalized to control oocytes exposed to 100  
158  $\mu$ M ACh was: oxantel > ACh >>> pyrantel >>> epibatidine > nicotine  $\sim$  3-bromocytosine  $\sim$  DMPP  
159  $\sim$  morantel  $\sim$  cytosine  $\sim$  levamisole. Taken together, these observations provide strong evidence that  
160 the *Tsu-ACR-16-like* receptor represents the preferential molecular target for oxantel. Interestingly,  
161 when exposed to 100  $\mu$ M ACh for 1-3 min the *Tsu-ACR-16-like* receptor did not show a fast-  
162 desensitization kinetics (Suppl. Fig. 2) which is a distinctive characteristic of the *N-AChR* of  
163 nematode such as *Asu-ACR-16* [29] and the *ACR-16* from *Parascaris equorum* (*Peq-ACR-16*) [33].

164

### 165 2.4. Dose-response curve of oxantel and pyrantel

166 Oxantel and pyrantel have similar chemical structures (Fig. 5A), but their potencies on the *Tsu*-ACR-  
167 16-like receptor were found to be significantly different (Fig. 4). We performed a dose-response study  
168 on oxantel and pyrantel to determine their  $EC_{50}$  values, their relative maximum current responses,  
169  $I_{max}$ , and their Hill slopes,  $n_H$ . The mean current response of positive control oocytes exposed to 300  
170  $\mu$ M ACh was used for normalization. Fig. 5B shows representative traces and dose-response  
171 relationships of the normalized inward currents (mean  $\pm$  SEM) induced by different concentrations  
172 of oxantel or pyrantel. The  $EC_{50} \pm$  SE for oxantel ( $9.49 \pm 1.13 \mu$ M) was significantly lower than that  
173 of pyrantel ( $148.5 \pm 1.19 \mu$ M,  $P < 0.001$ ). The relative maximum current response,  $I_{max}$  (mean  $\pm$  SE)  
174 was significantly larger for oxantel ( $86.85 \pm 4.63\%$ ) than pyrantel ( $29.41 \pm 1.95\%$ ,  $P = 0.003$ ),  
175 whereas no significant difference was found between the Hill slopes,  $n_H$  (mean  $\pm$  SE), of oxantel ( $2.51$   
176  $\pm 1.31$ ) and pyrantel ( $3.13 \pm 1.07$ ).

177

## 178 2.5. Antagonists

179 To further characterize the pharmacology of *Tsu*-ACR-16-like receptor, we tested 3 selected  
180 antagonists: dihydro- $\beta$ -erythroidine (DH $\beta$ E),  $\alpha$ -bungarotoxin ( $\alpha$ -BTX) and the anthelmintic,  
181 derquantel. Fig. 6 shows the effect of 10  $\mu$ M DH $\beta$ E and 10  $\mu$ M derquantel on the *Tsu*-ACR-16-like  
182 receptor along with representative current responses. The initial ACh (100  $\mu$ M) current response of  
183 each oocyte was used for normalization, to measure the reduced current responses in the presence of  
184 the antagonists. For DH $\beta$ E, the mean  $\pm$  SEM inhibition was very small (i.e.  $7.60 \pm 1.6\%$ ) and no  
185 inhibition was observed for derquantel ( $0.16 \pm 1.6\%$ ). The effect of  $\alpha$ -BTX is given in Figure 7A  
186 which shows the response-inhibition of the *Tsu*-ACR-16-like receptor to 100  $\mu$ M ACh when 10  $\mu$ M  
187  $\alpha$ -BTX is applied 10 s before the second application of 100  $\mu$ M ACh (test oocytes). Fig. 7B shows  
188 the effect of the *Tsu*-ACR-16-like receptor when exposed to 100  $\mu$ M ACh, only (control oocytes).  
189 The first current response of 100  $\mu$ M ACh (ACh1) was used for normalization. Representative current



190 traces along with a bar chart presenting the normalized mean  $\pm$  SEM of the second and third drug  
191 application of test- and control oocytes are given in Fig. 7A and 7B. The 10  $\mu$ M  $\alpha$ -BTX significantly  
192 ( $P < 0.0001$ ) reduced the current response of ACh to  $8.3 \pm 2.4\%$  of the test oocytes (Fig. 7A). This  
193 reduction was not observed in the control oocytes (Fig. 7B), thus, when  $\alpha$ -BTX was applied 10 s  
194 before the second application of ACh, the current response was significantly reduced in test oocytes  
195 as compared to control oocytes (Fig. 7A and 7B,  $P < 0.0001$ ).

196

### 197 **3. Discussion**

198 In the present study, we report the identification and the functional expression of the *Tsu*-ACR-16-  
199 like receptor, a novel AChR subtype corresponding to the first specific drug target for oxantel to be  
200 reported in any nematode species. In reference to the previously reported *L*-AChR, *N*-AChR, and *M*-  
201 AChR (respectively for Levamisole-sensitive, Nicotine-sensitive and Morantel-sensitive –AChR  
202 subtypes), we named the novel oxantel-sensitive AChR subtype: the *O*-AChR.

203

204 *The O-AChR is a novel receptor subtype specific to Clade I nematode species with original*  
205 *pharmacological properties*

206 Use of screens for *C. elegans* mutants that survive exposure to the broad-spectrum anthelmintics  
207 provided a means to decipher their molecular targets in a wide range of nematode species. However,  
208 this approach was not helpful for oxantel because the *C. elegans* is insensitive to this drug [34]. The  
209 weak, but measurable activity of oxantel on recombinant *N*-AChR from *C. elegans* and *A. suum*,  
210 supported the hypothesis that a putative ACR-16 homologs in *Trichuris* species could be involved in  
211 an oxantel-sensitive receptor. Williamson et al. [35] reported that only two members from the ACR-  
212 16 group could be identified in the genomic data from the Clade I species *T. spiralis*. In agreement  
213 with this finding, our search for ACR-16 homologs only retrieved two sequences in each of the

214 *Trichuris* species investigated in the present work. The first one corresponded to the highly conserved  
215 AChR subunit encoded by the *acr-19* gene; the second one corresponded to a highly divergent subunit  
216 specific to Clade I nematode species designated as ACR-16-like.

217 When co-expressed in the *X. laevis* oocytes with the ancillary protein RIC-3, the ACR-16-like  
218 subunits from *T. suis* formed a functional homomeric channel (*O*-AChR) with unexpected  
219 pharmacological properties. Indeed, this receptor was highly sensitive to oxantel which is in contrast  
220 to the *Asu*-ACR-16 for which a low agonist effect of oxantel has been reported (i.e. <10% of the  
221 control ACh current) [29] and to the *Cel*-ACR-16 on which oxantel has an antagonistic effect [30].  
222 Likewise, pyrantel had a relatively high effect on the *Tsu*-*O*-AChR, whereas pyrantel had no agonist  
223 effect on *Asu*-ACR-16 [29] or *Cel*-ACR-16, but in contrast, showed an antagonistic effect on the  
224 latter, which was ascribed to pyrantel acting as an open channel blocker [28]. In accordance with this  
225 assumption, patch-clamp recording studies from isolated *A. suum* muscle cells, show that both oxantel  
226 and pyrantel to act as agonists and open channel blockers [36,37]. Another surprising difference  
227 between the *Tsu*-*O*-AChR and the ACR-16 receptors from *A. suum*, *C. elegans* and *P. equorum* is the  
228 lack of sensitivity to nicotinic agonists [28,29,33]. Since oxantel has been characterised as an agonist  
229 selective for the *N*-subtypes of the ionotropic AChRs [16] which include the ACR-16 receptors, we  
230 expected the *Tsu*-*O*-AChR receptor to be highly sensitive to nicotine, cytosine, 3-bromocytosine,  
231 epibatidine and DMPP, but only small current responses were observed using these agonists. Another  
232 feature of the *Tsu*-*O*-AChR receptor is its slow desensitization kinetics, which contrasts with the faster  
233 desensitization of the *N*-AChR from *C. elegans* [38], *A. suum* [29] and *P. equorum* [33].

234 Interestingly, we also showed that the antagonist,  $\alpha$ -BTX had a potent inhibitory effect on the ACh  
235 induced current responses of the *Tsu*-*O*-AChR whereas *A. suum* [29] and *C. elegans* *N*-AChR [28]  
236 are nearly insensitive to  $\alpha$ -BTX. We point out however, that  $\alpha$ -BTX only induced a strong inhibitory  
237 effect when  $\alpha$ -BTX was applied 10 s before the application of ACh suggesting a slow association

238 time of  $\alpha$ -BTX. The *Tsu-O*-AChR was virtually insensitive to DH $\beta$ E and insensitive to derquandel.  
239 This also contrasts with the *Asu-N*-AChR which is moderately sensitive to DH $\beta$ E (~ 65% inhibition)  
240 and derquandel (~ 60% inhibition) [29] and the *Cel-N*-AChR which is highly sensitive to DH $\beta$ E [28].  
241 Another notifiable difference is the large current response of the *Tsu-O*-AChR. In the RIC-3  
242 experiments we found a mean current response to 100  $\mu$ M ACh of  $7.54 \pm 0.74$ ,  $\mu$ A ( $n=32$ ), whereas  
243 the current response of *Asu-N*-AChR to 100  $\mu$ M ACh was  $290.6 \pm 63.7$  nA ( $n=23$ ) [29], and for *Cel-*  
244 *ACR-16* to 300  $\mu$ M ACh ~ 400 nA. For comparison, the current responses to 300  $\mu$ M ACh of the  
245 *Tsu-O*-AChR was  $12.94 \pm 0.77$   $\mu$ A,  $n=24$  (mean  $\pm$  SEM). Taking into consideration variation between  
246 studies, (i.e. number of days for receptor expression), the *Tsu-O*-AChR induced a current response  
247 approximately 26 and 19 times higher than *Asu-N*-AChR and *Cel-N*-AChR, respectively.  
248 Taken together, these results strongly support our hypothesis that *O*-AChR and *N*-AChR represent  
249 two distinct class of ionotropic AChR. Despite the important differences, it is noteworthy that there  
250 are also similarities between the *O*- and *N*-AChR: both subtypes are not activated by the anthelmintic  
251 drugs levamisole or morantel [27-29].

252

### 253 *Sensitivity to oxantel and pyrantel*

254 Small changes in structure of acetylcholine agonists can have large effects on the selectivity and  
255 affinity of nicotinic agonists [39]. Perhaps it is not surprising that pyrantel which was modified by  
256 replacing the 2-thiophene moiety with the an *m*-oxyphenol group [17] to produce oxantel has a  
257 different pharmacology. Thus, the anthelmintic spectrum of oxantel and pyrantel is very different.  
258 Pyrantel is a broad-spectrum anthelmintic with no effect on adult *Trichuris* [17] whereas oxantel is  
259 a narrow-spectrum anthelmintic with a potent and selective effect on adult *Trichuris* [19–22]. This  
260 spectrum difference has previously raised the question whether a cholinergic receptor subtype

261 present in *Trichuris* spp. are different from other intestinal nematode parasites [16], which indeed is  
262 now strongly supported by our results .

263

264 In conclusion, the discovery of the *Tsu-O*-AChR provides new insights for the high efficacy and  
265 specificity of oxantel on whipworms, and provide us with an example of an anthelmintic, that due to  
266 its narrow-spectrum will have a lower impact on non-target nematode species. The advantage of  
267 such an anthelmintic is the reduced risk of inducing anthelmintic resistance in other parasitic  
268 nematode species, and a lower impact on the environmental biodiversity after drug expulsion from  
269 the host (i.e. primarily animal hosts).

270

## 271 **4. Material and methods**

### 272 *4.1. Ethic statement*

273 The worm material used in this study was obtained during a previous described study [40]  
274 performed at the Experimental Animal Unit, University of Copenhagen, Denmark according to the  
275 national regulations of the Danish Animal Inspectorate (permission no. 2015-15-0201-00760). The  
276 neurologic tissue from *X. laevis* was obtained from one adult female, which was anaesthetized by  
277 submersion into a tricaine solution (ethyl 3-aminobenzoate methanesulfonate, 2g/l) and  
278 subsequently decapitated. All procedures involving live material were performed according to the  
279 national regulations of the Danish National Animal Experiments Inspectorate (permission no. 2015-  
280 15-0201-00560).

281

### 282 *4.2. Drugs*

283 All drugs except 3-bromocytisine, DH $\beta$ E,  $\alpha$ -BTX and derquantel were purchased at Sigma-Aldrich  
284 (Copenhagen, DK). 3-bromocytisine, DH $\beta$ E and  $\alpha$ -BTX were obtained from Tocris Bioscience

285 (Abingdon, UK) and derquantel was purchased at Cayman Chemicals (Ann Arbor, MI, USA). Stock  
286 solutions of drugs were made in either Kulori medium or DMSO (100%) and stored at -20 or 5°C  
287 (i.e. ACh) until use. Before use, stock solutions were dissolved in Kulori medium with a maximum  
288 final concentration of DMSO of 0.1%.

289

#### 290 4.3. Bioinformatics and sequence analysis

291 The *Asu*-ACR-16 (accession number AKR16139) and the *Cel*-ACR-16 (accession number  
292 NP505207) were used as queries in database searches for *Trichuris suis* ACR-16 (*Tsu*-ACR-16) and  
293 ACR-16s from other Clade I parasitic nematodes (i.e. *Trichuris* spp. and *Trichinella spiralis*) in the  
294 protein-protein BLAST (BLASTp) service at the National Center for Biotechnology Information  
295 (NCBI) service [41]. *Cel*-ACR-16 and *Cel*-ACR-19 were used in an alignment with the identified  
296 putative ACR-16 sequences from Clade I parasitic nematodes. The accession numbers of the  
297 sequences used for the alignment are:

298 ***Caenorhabditis elegans***: ACR-16 [NP505207](#), ACR-19 [NP\\_001129756](#). ***Trichuris suis***: putative  
299 ACR-16 [KFD48832.1](#) putative ACR-19 [KFD70086.1](#). ***Trichuris trichiura***: putative ACR-16  
300 [CDW52185](#); putative ACR-19 [CDW53523](#). ***Trichuris muris***: putative ACR-16  
301 WBGene00290200; putative ACR-19 WBGene00291941. ***Trichuris spiralis***: putative ACR-16  
302 [KRY38920.1](#), putative ACR-19 [KRY27533.1](#).

303 Signal peptide was predicted using the SignalP 4.1 server [42] and the transmembrane regions were  
304 predicted using the TMHMM version 2 server [43]. Deduced amino-acid sequences were aligned  
305 using MUSCLE Phylogenetic analysis was performed on deduced amino-acid sequence. Maximal  
306 likelihood phylogeny reconstruction was performed using PhyML V20120412

307 (<https://github.com/stephaneguindon/phyml-downloads/releases>) and the significance of internal  
308 tree branches was estimated using bootstrap resampling of the dataset 100 times. The accession  
309 numbers sequences used for the analysis are:

310 ***Caenorhabditis elegans***: ACR-7 NP\_495647; ACR-8 NP\_509745; ACR-9 NP\_510285; ACR-10  
311 NP\_508692; ACR-11 NP\_491906; ACR-12 NP\_510262; ACR-14 NP\_495716; ACR-15  
312 NP\_505206; ACR-16 NP\_505207; ACR-19 NP\_001129756; EAT-2 NP\_496959; LEV-1  
313 NP\_001255705; UNC-29 NP\_492399; UNC-38 NP\_491472; UNC-63 NP\_491533.

314 ***Haemonchus contortus***: ACR-16 MH806893. ***Soboliphyme baturini***: acr-16-like VDP07835.1.

315 ***Steinernema glaseri***: ACR-16 KN173365.1. ***Steinernema feltiae***: ACR-19 KN166031.1.

316 ***Toxocara canis***: ACR-16 VDM44142.1; ACR-19 VDM36763.1. ***Parascaris equorum***: ACR-26

317 KP756902; ACR-27 KP756903. ***Trichuris suis***: ACR-16-like KFD48832; ACR-19 KFD70086..

318 ***Trichuris muris***: ACR-16-like WBGene00290200; ACR-19 WBGene00291941. ***Trichuris***

319 ***trichiura***: ACR-16-like CDW52185; ACR-19 CDW53523. ***Trichinella spiralis***: ACR-16-like

320 KRY38920.1; ACR-19 KRY27533.

321

#### 322 4.4. *cDNA synthesis*

323 Worm material was kept in RNA later (Sigma-Aldrich, Copenhagen, DK) at -20°C until use. Total  
324 RNA was extracted from whole adult *T. suis* males and females using TRIzol LS Reagent  
325 (Invitrogen™). For each isolation, 15 worms were used. The RNA was DNase treated using DNase  
326 I, Amplification Grade (Invitrogen). The whole brain of one *X. laevis* frog was used to extract RNA  
327 using Tri™ Reagent®; (MRC. Inc; US) and M tubes in an OctoMacs homogenizer machine (Milteny,  
328 Germany) following the manufacturer' protocol. The isolated RNA was DNase treated using the  
329 RNeasy MinElute Cleanup kit (Qiagen, Germany). The quantity and quality of RNA from *T. suis* and  
330 *X. laevis* was assessed by OD measurement in a Nanodrop spectrophotometer (Thermo Scientific,

331 Demark) and by visual inspection in an agarose gel (1%). First strand cDNA was synthesised from  
332 2.5 µg of total RNA from *T. suis* and brain RNA from *X. laevis* using SuperScript IV VILO Master  
333 Mix (Invitrogen™) according to manufacturer's protocol.

334

#### 335 4.5. PCR and cloning of a full-length *T. suis* ACR-16 subunit and *Xle-RIC-3*

336 To amplify the full-length coding sequence of the *Tsu-acr-16-like* subunit, a specific primer pair,  
337 containing the *Bam*HI and the *Not*I restriction enzyme sites and 5 additional nucleotides (*Tsu-acr-16-*  
338 *F-5'*- GAATC-*Bam*HI-ATGCGGCCGATAATTTTCCTC-3' and *Tsu-acr-16-R- 5'*-ACGTT *Not*I  
339 TCACACAGTTAAATGGGGAGAAC-3') were designed using the putative *Tsu-acr-16-like*  
340 sequence in Wormbase under gene number M514\_10316. The specific primer pair used to amplify  
341 the *Xle-ric-3* sequence are described elsewhere [32]. Restriction enzyme sites (*Bam*HI and *Not*I) were  
342 included to facilitate ligation into the expression vector pXOOM [44] which was linearized with the  
343 restriction enzymes *Bam*HI and *Not*I. PCR amplifications were performed with Platinum SuperFi  
344 Green PCR Master Mix (Invitrogen) following the manufacturer' recommendations. Amplicons were  
345 evaluated by gel electrophoresis, digested with *Bam*HI and *Not*I, purified with QIAquick Gel  
346 Extraction Kit (Qiagen), cloned into pXOOM and sequenced. A positive clone of *Tsu-acr-16-like*  
347 subunit and *Xle-ric-3* was selected and linearized with the restriction enzyme *Nhe*I before *in vitro*  
348 transcription using the mMessage mMachine T7 Transcription Kit (Ambion). The cRNA was purified  
349 using MEGAclear (Thermo Scientific, Demark). Quantity and quality of cRNA was evaluated by OD  
350 measurement in a Nanodrop spectrophotometer (Thermo Scientific, Demark) and by visual  
351 inspection in an agarose gel (1%).

352

#### 353 4.6. Microinjection of *Xenopus laevis* oocytes

354 *Xenopus laevis* oocytes were obtained from EcoCyte Bioscience (Castrop-Rauxel, Germany) and kept  
355 at 19°C in Kulori medium (90 mM NaCl, 4 mM KCl, 1 mM MgCl<sub>2</sub>, 1 mM CaCl<sub>2</sub>, 5 mM HEPES,  
356 pH:7.4) until injection. Oocytes were injected with 50 nl of cRNA in RNase-free water using a  
357 microinjector (Nanojet, Drummond Broomal, PA, USA). To test *ric-3* effects on the receptor  
358 expression, 25 ng *Tsu-acr-16-like* cRNA was injected alone or with either 5 ng *Asu-ric-3* or 5 ng *Xle-*  
359 *ric-3* cRNA. To exclude endogenous nAChR expression induced by *Asu-ric-3*, 5 ng *Asu-ric-3* was  
360 injected alone. These amounts of cRNA were chosen in order to compare the drug-potency results of  
361 the *Tsu-ACR-16-like* receptor with that of *Asu-ACR-16*[29]. Only half (i.e. 12.5 ng *Tsu-acr-16-like*  
362 cRNA and 2.5 ng *Asu-ric-3*) was used for the dose-response curves and antagonist analysis. To allow  
363 for receptor expression, the injected oocytes were incubated in Kulori medium at 19°C for 3-7 days  
364 and the Kulori medium was changed daily.

365

#### 366 4.7. Two-electrode voltage clamp of *Xenopus laevis* oocytes

367 Two-electrode voltage-clamp (TEVC) recordings were obtained using an Oocyte Clamp Amplifier  
368 OC-725 B (Warner Instruments Corp., USA) connected to an Axon Digidata® 1440A digitizer (Axon  
369 Instruments, Molecular Devices, USA) and was performed at ~19°C under continuous flow of Kulori  
370 medium with the oocytes clamped at -60 mV. Data were sampled at 2 kHz using the pClamp 10.4  
371 acquisition software (Axon Instruments, Molecular Devices, USA). The microelectrodes were pulled  
372 from glass capillaries (TW 120.3, World precision instruments, USA) on a programmable  
373 micropipette puller (Narishige, Japan). The resistance when filled with 3 M KCl ranged from 0.5 to  
374 1.5 MΩ. Ag/AgCl reference electrodes were connected to the bath with agar bridges. For a minimum  
375 of 4 hours prior to recording, all oocytes were incubated in BAPTA-AM at a final concentration of  
376 100 μM to chelate intracellular Ca<sup>2+</sup> ions and hereby prevent activation of endogenous calcium



377 activated chloride channels during recordings. Recordings from non-injected oocytes were used as  
378 negative controls.

379

#### 380 4.8. *Drug-potency-tests*

381 All agonists were used at a final concentration of 100  $\mu\text{M}$  and were tested in 3-4 experiments using  
382 3-4 different batches of oocytes batches. For each experiment, 6 oocytes were tested per drug. For  
383 each experiment, 6 oocytes were exposed to 100  $\mu\text{M}$  ACh for 10 s, and all other responses in the  
384 same experiment, were normalized to the mean response of these controls. Initial experiments showed  
385 a consistent decrease in the response to 100  $\mu\text{M}$  ACh when applied repeatedly, even after washing  
386 periods for up to 5 min between agonist applications. Therefore, each drug was tested on oocytes not  
387 previously exposed to ACh (100  $\mu\text{M}$ ). The total number of oocytes examined per drug was:  $n = 23$   
388 for oxantel,  $n = 16$  for pyrantel,  $n = 15$  for epibatidine,  $n = 16$  for nicotine,  $n = 15$  for 3- bromocytisine,  
389  $n = 16$  for DMPP,  $n = 17$  for morantel,  $n = 17$  for cytisine and  $n = 15$  for levamisole. Each drug was  
390 applied for 10 s followed by wash off until the current had returned to pre-stimulation values.

391

#### 392 4.9. *Dose-response studies.*

393 The dose-response studies were in total performed on 3 different oocyte batches. For oxantel the  
394 number of measurements per drug concentration were as follows: 0.3  $\mu\text{M}$ ,  $n=6$ ; 0.1  $\mu\text{M}$ ,  $n=6$ ; 3  $\mu\text{M}$ ,  
395  $n=6$ ; 3  $\mu\text{M}$ ,  $n=6$ ; 10  $\mu\text{M}$ ,  $n=15$ ; 30  $\mu\text{M}$ ,  $n=12$ ; 100  $\mu\text{M}$ ,  $n=13$ ; 300  $\mu\text{M}$ ,  $n=14$ . For pyrantel  $n$  per drug  
396 concentration were: 1  $\mu\text{M}$ ,  $n=6$ ; 3  $\mu\text{M}$ ,  $n=6$ ; 10  $\mu\text{M}$ ,  $n=6$ ; 30  $\mu\text{M}$ ,  $n=6$ ; 100  $\mu\text{M}$ ,  $n=15$ ; 300  $\mu\text{M}$ ,  $n=23$ ;  
397 1000  $\mu\text{M}$ ,  $n=12$ ; 3000  $\mu\text{M}$ ,  $n=20$ . For each experiment, 6 oocytes were exposed to 300  $\mu\text{M}$  ACh for  
398 10 s, and all other responses in the same experiment, were normalized to the mean response of these  
399 positive controls. The ACh concentration of 300  $\mu\text{M}$  was used to reach the supposed maximal

400 activation of the *Tsu*-ACR-16-like receptor. Each drug and drug concentration were tested as  
401 described for the drug-potency-tests.

402

#### 403 4.10. *Antagonists*

404 The effects of the antagonists DH $\beta$ E, derquantel and  $\alpha$ -BTX (10  $\mu$ M) were examined in the presence  
405 100  $\mu$ M ACh as previously described for *Asu*-ACR-16 [29]. In short, *X. laevis* oocytes co-injected  
406 with *Tsu-acr-16-like*- and *Xle-ric-3* cRNA were sequentially superfused with ACh for 10 s, then ACh  
407 + antagonist for 10 s, and finally with ACh for 10 s. For  $\alpha$ -BTX a five-step protocol including a pre-  
408 incubation (10 s) with the antagonist (10  $\mu$ M) was used with ACh (100  $\mu$ M). *Xenopus laevis* oocytes,  
409 co-injected with *Tsu-acr-16-like*- and *Xle-ric-3* cRNAs, were exposed to: i) a control application of  
410 100  $\mu$ M ACh for 10 s (first application); ii) followed by a wash-off period of 5 min; iii) then by an  
411 application of 10  $\mu$ M  $\alpha$ -BTX for 10 s, immediately followed by 100  $\mu$ M ACh and the continued  
412 presence of  $\alpha$ -BTX for 10 s (second application); iv) then a wash-off period of 5 min; v) and finally  
413 an application of ACh for 10 s (third application). Control oocytes were exposed to ACh for 10 s in  
414 3 consecutive steps, each separated by a wash-off period of 5 min. For each antagonist,  $n=6-8$ .

415

#### 416 4.11. *Electrophysiological data and statistically analysis*

417 All acquired electrophysiological data were analysed with Clampfit 10.7 (Molecular Devices,  
418 Sunnyvale, CA, USA) and GraphPad Prism 8 (GraphPad Software, La Jolla, CA, USA) and from all  
419 experiments, peak currents from BAPTA-AM-incubated oocytes were measured after application of  
420 drugs. For the auxiliary protein (RIC-3) test, the largest group mean current in response to 100  $\mu$ M  
421 ACh was set to 100%, and all other responses were normalized to this. The relative means were  
422 statistical analysed using One-Way ANOVA with a Dunnett's Test and  $P < 0.05$  was considered  
423 significant. For the drug-potency-test, peak currents of drugs were normalized to the peak current

424 measured in the presence of 100  $\mu\text{M}$  ACh and was expressed as mean  $\pm$  SEM. Data was tested for  
425 normality using the D'Agostino-Pearson normality test. Drug-group means were statistical analysed  
426 using One-Way ANOVA with a Turkey's Multiple Comparison Test where  $P < 0.05$  was considered  
427 significant.

428

429 For the dose-response relationships, and for each experiment, 6 oocytes were exposed to ACh (300  
430  $\mu\text{M}$ ) for 10 s, and all other drug responses in the same experiment, were normalized to the mean  
431 response of these controls. The normalized current as a function of drug concentration allowed fitting  
432 the dose-response curves with a Hill equation, using nonlinear regression analysis with a variable  
433 slope model in GraphPad Prism 8. The following equation was used:

434

$$435 \quad I_{\text{rel}} = I_{\text{min}} + (I_{\text{max}} - I_{\text{min}}) / (1 + 10^{((\text{Log}EC_{50} - [D]) * n_{\text{H}})}),$$

436

437 where  $I_{\text{rel}}$  is the mean relative current,  $I_{\text{max}}$ , is the relative current obtained at saturating agonist  
438 concentration,  $I_{\text{min}}$  is the relative current obtained at agonist concentration 0  $\mu\text{M}$ ,  $EC_{50}$  is the  
439 concentration of agonist resulting in 50% of the maximal current response,  $[D]$  is the drug  
440 concentration and  $n_{\text{H}}$  is the Hill coefficient.  $I_{\text{max}}$ ,  $EC_{50}$  and  $n_{\text{H}}$  were fitted as free parameters whereas  
441  $I_{\text{min}}$ , was constrained to 0.

442 For the antagonist test with  $\alpha$ -BTX, the current response of  $\alpha$ -BTX and ACh in the continued presence  
443 of  $\alpha$ -BTX (second application) was normalized to the first response at 100  $\mu\text{M}$  ACh (first application)  
444 which was set to 1. The group mean of the  $\alpha$ -BTX response were statistical analysed using One-Way  
445 ANOVA with a Dunnett's test.

446

447 **6. Acknowledgement**

448 The study was supported by the Independent Research Fund Denmark (DFR – 4184-00210), the  
449 Danish National Advanced Technology Foundation (5184-00048B) and the Lundbeck Foundation  
450 (R9-A1131). authors would like to thank Richard Martin at Iowa State University, USA for  
451 providing the *Asu*-ACR-16 and *Asu*-RIC-3. RJM is supported by NIH, the National Institute of  
452 Allergy and Infectious Diseases grants R01AI047194-17, R21AI092185-01A1 and the E. A.  
453 Benbrook Foundation for Pathology and Parasitology. In addition, the authors wish to thank Vibeke  
454 Grøsfjeld Christensen at the Veterinary and Animal Sciences, University of Copenhagen for  
455 technical assistance.

456

457

458

459 **Figure legends**

460 **Figure 1**

461 Maximum likelihood tree showing relationships of the ACR-16 related acetylcholine receptor  
462 (nAChR) subunits from *Trichuris species*, with other *C. elegans* and *T. spiralis* nAChR subunits.

463 Tree was built upon an alignment of nAChR subunit deduced amino-acid sequences. The tree was  
464 rooted with the *Parascaris equorum* ACR-26 and ACR-27 sequences that are absent from *C. elegans*  
465 and clade I nematode species (Courtot *et al.* 2018). Scale bar represents the number of substitutions  
466 per site. Bootstrap values are indicated on branches. Accession numbers for sequences used in the  
467 phylogenetic analysis are provided in the Material and Methods section. *C. elegans* nAChR subunit  
468 groups are named as proposed by Mongan *et al.* [31], *Cel*, *Tsu*, *Ttr*, *Tmu*, *Tsp* and *Peq* refer to  
469 *Caenorhabditis elegans*, *Trichuris suis*, *Trichuris trichiura*, *Trichuris muris* and *Parascaris equorum*,  
470 respectively.

471

472 **Figure 2**

473 Amino acid alignment of ACR-16-(like) and ACR-19 subunit sequences from the Clade I parasitic  
474 nematodes *Trichuris suis*, *T. trichiura*, *T. muris*, *Trichinella spiralis* and *Caenorhabditis elegans*.

475 Predicted signal peptide sequences are shaded in grey, the Cys-loop, the transmembrane regions  
476 (TM1-TM4), and the YxCC motif that characterize an  $\alpha$ -subunit are indicated above the sequences.

477 Conserved amino acids between ACR-16-(like) and ACR-19 sequences (dark blue), conserved amino  
478 acids between all ACR-16-(like) sequences (red), conserved amino acid between all ACR-19  
479 sequences (light green), conserved amino acid between ACR-16-like sequences of Clade I parasitic  
480 nematodes and ACR-19 of *C. elegans* (light blue).

481

482 **Figure 3**

483 Effect of the ancillary protein Resistance-to-cholinesterase (RIC-3) from *Ascaris suum* (*Asu-RIC-3*)  
484 and *Xenopus laevis* (*Xle-RIC-3*) on the functional expression of the ACR-16-like nAChR from  
485 *Trichuris suis* (*Tsu-ACR-16-like* receptor). Representative sample traces of inward current in  
486 response to 100  $\mu$ M ACh are shown together with a bar chart presenting the relative currents (mean  
487  $\pm$  SEM). Oocytes injected with *Tsu-acr-16-like*- or *Asu-ric-3* cRNA alone did not respond to 100  $\mu$ M  
488 ACh. The relative current of oocytes co-injected with *Tsu-acr-16-like* and *Asu-ric-3* cRNA was  
489 significantly higher than oocytes injected with *Tsu-acr-16-like* and *Xle-ric-3* cRNA.  $P < 0.05$ ;  
490 significantly different as indicated, Dunnett's test.

491

#### 492 **Figure 4**

493 The effect of 9 agonists on *Tsu-ACR-16-like* receptor. Representative sample traces and a bar chart  
494 (mean  $\pm$  SEM) show the rank order potency series of 4 cholinergic anthelmintics: oxantel (oxa),  
495 pyrantel (pyr), morantel (mor), levamisole (lev) and 5 nAChR agonists: epibatidine (epi), nicotine  
496 (nic), 3-bromocytisine (3-bc), dimethylphenylpiperazinium (DMPP) and cytisine (cyt).  $P < 0.05$ ;  
497 significantly different as indicated; Turkey's multiple comparison test.

498

#### 499 **Figure 5a**

500 Chemical structure of oxantel and pyrantel. Oxantel: free drawing after  
501 <https://pubchem.ncbi.nlm.nih.gov/compound/oxantel#section=2D-Structure>. Pyrantel: free drawing  
502 after <https://pubchem.ncbi.nlm.nih.gov/compound/pyrantel#section=2D-Structure>

503

#### 504 **Figure 5b**

505 Dose-response curves for oxantel (oxa) and pyrantel (pyr). The current response on *Tsu-ACR-16-*  
506 like receptor is normalised to current responses induced by 300  $\mu$ M ACh and given as mean  $\pm$

507 SEM. The  $EC_{50} \pm SD$  values were  $9.48 \pm 1.15 \mu\text{M}$  for oxa and  $152.7 \pm 1.20 \mu\text{M}$  for pyr, the relative  
508 maximum current responses,  $I_{\text{max}}$  were  $86.85 \pm 4.63\%$  and  $29.41 \pm 1.95\%$ , and the Hill slope,  $n_{\text{H}}$ ,  
509  $2.51 \pm 1.30$  and  $3.13 \pm 1.07$  for oxa and pyr, respectively.

510

#### 511 **Figure 6**

512 Effect of the antagonists: dihydro- $\beta$ -erythroidine (DH $\beta$ E) and derquantel (der) on *Tsu*-ACR-16-like  
513 receptor mediated 100  $\mu\text{M}$  ACh current response. Results are given as normalized mean  $\pm$  SEM  
514 inhibition of the initial current response of 100  $\mu\text{M}$  ACh. DH $\beta$ E produced an almost insignificant  
515 block of the *Tsu*-ACR-16-like receptor mediated ACh response (i.e.  $7.60 \pm 1.61\%$ ) and no effect  
516 was observed for der ( $0.16 \pm 1.61\%$ ).

517

#### 518 **Figure 7a and 7b**

519 Effect of the antagonists  $\alpha$ -bungarotoxin ( $\alpha$ -BTX) on *Tsu*-ACR-16-like receptor mediated 100  $\mu\text{M}$   
520 ACh current response. The first ACh current response (ACh1) is set to 100 for both test- (figure 5a)  
521 and control oocytes (figure 5b), and subsequent current responses are given as normalized mean  $\pm$   
522 SEM inhibition of ACh1.  $P < 0.05$ ; significantly different as indicated, Dunnett's test.

523 **Supplementary figure legends**

524 **Supplementary figure 1**

525 **Distance tree showing relationships of the ACR-16-like acetylcholine receptor (AChR)**  
526 **subunits from Clade I nematode species, with other AChR subunits from the ACR-16 group**  
527 **from nematode species representative from Clade III, Clade IV, and Clade V.**

528 NJ-Tree was built upon an alignment of AChR subunit deduced amino-acid sequences. The tree  
529 was rooted with the *C. elegans* UNC-63 sequence. Scale bar represents the number of substitutions  
530 per site. Bootstrap values (1000 replicates) are indicated on branches. Accession numbers for  
531 sequences used in the analysis are provided in Material and Methods section. Nematode clades refer  
532 to Blaxter et al. 1998 [1]. AChR subunit sequences from Clade I species are highlighted in red,  
533 AChR subunit sequences from Clade III species are highlighted in blue, AChR subunit sequences  
534 from Clade V species are highlighted in pink (in black for *C. elegans*). *Cel*, *Hco*, *Sba*, *Sgl*, *Sfe*, *Tca*,  
535 *Tsp*, *Tsu*, *Ttr* and *Tmu* refer to: *Caenorhabditis elegans*, *Haemonchus contortus*, *Soboliphyme*  
536 *baturini*, *Steinernema glaseri*, *Steinernema feltiae*, *Toxocara canis*, *Trichinella spiralis*, *Trichuris*  
537 *suis*, *Trichuris trichiura*, and *Trichuris muris* respectively.

538

539 **Supplementary figure 2**

540 **Desensitization kinetics of *Tsu*-ACR16-like receptor.** A representative response of the *Tsu*-  
541 ACR16-like receptor to 1 min exposure of 100  $\mu$ M ACh. The *Tsu*-ACR16-like receptor is  
542 characterized by a slow-desensitization kinetic as compared to *Asu*-ACR-16 [29] and *Peq*-ACR-16  
543 [33].

544

545



546 **References**

- 547 1. Blaxter ML, De Ley P, Garey JR, Liu LX, Scheldeman P, Vierstraete A, et al. A molecular  
548 evolutionary framework for the phylum Nematoda. *Nature*. 1998; 392(6671):71-5. doi:  
549 10.1038/32160. PMID: 9510248  
550
- 551 2. James SL, Abate D, Abate KH, Abay SM, Abbafati C, Abbasi N, et al. Global, regional, and  
552 national incidence, prevalence, and years lived with disability for 354 Diseases and Injuries for  
553 195 countries and territories, 1990-2017: A systematic analysis for the Global Burden of  
554 Disease Study 2017. *Lancet*. 2018; 392(10159): 1789–1858. doi:10.1016/S0140-  
555 6736(18)32279-7. PMID: 30496104  
556
- 557 3. Stephenson LS, Latham MC, Ottesen EA. Malnutrition and parasitic helminth infections.  
558 *Parasitology*; 2000; 121, Suppl S23-S38. DOI: [10.1017/s0031182000006491](https://doi.org/10.1017/s0031182000006491). PMID: 11386688  
559
- 560 4. Hall A, Hewitt G, Tuffrey V, Silva N. A review and meta-analysis of the impact of intestinal  
561 worms on child growth and nutrition. *Matern Child Nutr*. 2008; 4 Suppl 1(Suppl 1):118-236.  
562 DOI: [10.1111/j.1740-8709.2007.00127.x](https://doi.org/10.1111/j.1740-8709.2007.00127.x) PMID: 18289159  
563
- 564 5. Keiser J, Utzinger J. Efficacy of current drugs against soil-transmitted helminth infections:  
565 systematic review and meta-analysis. *JAMA*. 2008; 299(16):1937-48. DOI:  
566 10.1001/jama.299.16.1937. PMID: 18430913  
567
- 568 6. Belizario VY, Amarillo ME, Leon WU, Reyes AE, Bugayong MG, Macatangay BJC. A  
569 comparison of the efficacy of single doses of albendazole, ivermectin, and diethylcarbamazine

- 570 alone or in combinations against *Ascaris* and *Trichuris* spp. Bull World Health Organ. 2003;  
571 81(1):35-42. PMID: 12640474
- 572
- 573 7. Albonico M, Bickle Q, Ramsan M, Montresor A, Savioli L, Taylor M. Efficacy of mebendazole  
574 and levamisole alone or in combination against intestinal nematode infections after repeated  
575 targeted mebendazole treatment in Zanzibar. Bull World Health Organ. 2003; 81(5):343-52.  
576 PMID: 12856052
- 577
- 578 8. Tritten L, Silbereisen A, Keiser J. *In vitro* and *In vivo* efficacy of monepantel (AAD 1566)  
579 against laboratory models of human intestinal nematode infections. PLoS Negl Trop Dis. 2011;  
580 5(12):e1457. DOI: 10.1371/journal.pntd.0001457. PMID: 22216366
- 581
- 582 9. Steinmann P, Utzinger J, Du Z, Jiang J, Chen J, Hattendorf J, et al. Efficacy of single-dose and  
583 triple-dose albendazole and mebendazole against soil-transmitted helminths and *Taenia* spp.: a  
584 randomized controlled trial. PLoS One. 2011;6(9):e25003. DOI: 10.1371/journal.pone.0025003.  
585 PMID: 21980373
- 586
- 587 10. Knopp S, Mohammed KA, Speich B, Hattendorf J, Khamis IS, Khamis AN, et al. Albendazole  
588 and mebendazole administered alone or in combination with ivermectin against *Trichuris*  
589 *trichiura*: a randomized controlled trial. Clin Infect Dis. 2010; 51(12):1420-8. DOI:  
590 [10.1086/657310](https://doi.org/10.1086/657310). PMID: 21062129
- 591
- 592 11. Namwanje H, Kabatereine NB, Olsen A. Efficacy of single and double doses of albendazole and  
593 mebendazole alone and in combination in the treatment of *Trichuris trichiura* in school-age

- 594 children in Uganda. *Trans R Soc Trop Med Hyg.* 2011; 105(10):586-90. DOI:  
595 [10.1016/j.trstmh.2011.07.009](https://doi.org/10.1016/j.trstmh.2011.07.009) . PMID: 21885077  
596
- 597 12. Olsen A, Namwanje H, Nejsum P, Roepstorff A, Thamsborg SM. Albendazole and  
598 mebendazole have low efficacy against *Trichuris trichiura* in school-age children in Kabale  
599 District, Uganda. *Trans R Soc Trop Med Hyg.* 2009; 103(5):443-6. DOI:  
600 [10.1016/j.trstmh.2008.12.010](https://doi.org/10.1016/j.trstmh.2008.12.010). PMID: 19201005  
601
- 602 13. Sangster NC, Cowling A, Woodgate RG. Ten Events That Defined Anthelmintic Resistance  
603 Research. *Trends Parasitol.* 2018; 34(7):553-563. DOI: [10.1016/j.pt.2018.05.001](https://doi.org/10.1016/j.pt.2018.05.001). PMID:  
604 29803755  
605
- 606 14. Diawara A, Halpenny CM, Churcher TS, Mwandawiro C, Kihara J, Kaplan RM, et al.  
607 Association between response to albendazole treatment and beta -tubulin genotype frequencies  
608 in soil-transmitted helminths. *PLoS Negl Trop Dis.* 2013; 30;7(5):e2247. DOI:  
609 [10.1371/journal.pntd.0002247](https://doi.org/10.1371/journal.pntd.0002247). PMID: 23738029  
610
- 611 15. Krücken J, Fraundorfer K, Mugisha JC, Ramüncke S, Sifft KC, Geus D, et al. Reduced efficacy  
612 of albendazole against *Ascaris lumbricoides* in Rwandan schoolchildren. *Int J Parasitol Drugs*  
613 *Drug Resist.* 2017; 7(3):262-271. DOI: [10.1016/j.ijpddr.2017.06.001](https://doi.org/10.1016/j.ijpddr.2017.06.001). PMID: 28697451  
614
- 615 16. Martin RJ, Clark CL, Trailovic SM, Robertson AP. Oxantel is an N-type (methyridine and  
616 nicotine) agonist not an L-type (levamisole and pyrantel) agonist: classification of cholinergic

- 617 anthelmintics in *Ascaris*. Int J Parasitol. 2004; 34(9):1083-90. DOI:  
618 10.1016/j.ijpara.2004.04.014. PMID: 15313135  
619
- 620 17. McFarland JW, Howes HL. Novel anthelmintic agents. 6. Pyrantel analogs with activity against  
621 whipworm. J Med Chem. 1972; 15(4):365-8. DOI: 10.1021/jm00274a008. PMID: 4623095  
622
- 623 18. Sheehan DJ, Sheehan SM, Marchiondo AA. Discovery and Chemistry of Pyrantel, Morantel  
624 and Oxantel. Pyrantel Parasiticide Therapy in Humans and Domestic Animals. Edited by: Alan  
625 A. Marchiondo. Academic Press; 2016. pp. 1–19. [https://doi.org/10.1016/B978-0-12-801449-](https://doi.org/10.1016/B978-0-12-801449-3.00012-0)  
626 [3.00012-0](https://doi.org/10.1016/B978-0-12-801449-3.00012-0)  
627
- 628 19. Lee EL, Iyngkaran N, Grieve AW, Robinson MJ, Dissanaiké AS. Therapeutic evaluation of  
629 oxantel pamoate (1, 4, 5, 6-tetrahydro-1-methyl-2-[trans-3-hydroxystyryl] pyrimidine pamoate)  
630 in severe *Trichuris trichiura* infection. Am J Trop Med Hyg. 1976; 25(4):563-7. DOI:  
631 10.4269/ajtmh.1976.25.563. PMID: 961973  
632
- 633 20. Garcia EG. Treatment for trichuriasis with oxantel. Am J Trop Med Hyg. 1976 25(6):914-5.  
634 DOI: 10.4269/ajtmh.1976.25.914. PMID: 1008134  
635
- 636 21. Speich B, Ame SM, Ali SM, Alles R, Huwyler J, Hattendorf J, et al. Oxantel pamoate-  
637 albendazole for *Trichuris trichiura* infection. N Engl J Med. 2014; 370(7):610-20. DOI:  
638 [10.1056/NEJMoa1301956](https://doi.org/10.1056/NEJMoa1301956). PMID: 24521107  
639

- 640 22. Moser W, Ali SM, Ame SM, Speich B, Puchkov M, Huwlyer J, et al. Efficacy and safety of  
641 oxantel pamoate in school-aged children infected with *Trichuris trichiura* on Pemba Island,  
642 Tanzania: a parallel, randomised, controlled, dose-ranging study. *Lancet Infect Dis*. 2016;  
643 16(1):53-60. DOI: [10.1016/S1473-3099\(15\)00271-6](https://doi.org/10.1016/S1473-3099(15)00271-6). PMID: 26388169  
644
- 645 23. World Health Organization. Assessing the efficacy of anthelmintic drugs against  
646 schistosomiasis and soil-transmitted helminthiases. World Health Organization; 2013. Available  
647 at: <https://apps.who.int/iris/handle/10665/79019>  
648
- 649 24. Wolstenholme AJ, Neveu C. The interactions of anthelmintic drugs with nicotinic receptors in  
650 parasitic nematodes. *Emerg Top Life Sci*. 2017; 1 (6): 667–673.  
651 <https://doi.org/10.1042/ETLS20170096>  
652
- 653 25. Albuquerque EX, Pereira EFR, Alkondon M, Rogers SW. Mammalian Nicotinic Acetylcholine  
654 Receptors: From Structure to Function. *Physiol Rev*. 2009; 89(1):73-120. DOI:  
655 [10.1152/physrev.00015.2008](https://doi.org/10.1152/physrev.00015.2008). PMID: 19126755  
656
- 657 26. HoldenDye L, Joyner M, O'Connor V, Walker RJ. Nicotinic acetylcholine receptors: a  
658 comparison of the nAChRs of *Caenorhabditis elegans* and parasitic nematodes. *Parasitol*  
659 *Int*. 2013; 62(6):606-15. DOI: [10.1016/j.parint.2013.03.004](https://doi.org/10.1016/j.parint.2013.03.004). PMID: 2350039  
660
- 661 27. Qian H, Martin RJ, Robertson AP. Pharmacology of N-, L-, and B-subtypes of nematode  
662 nAChR resolved at the single-channel level in *Ascaris suum*. *FASEB J*. 2006; 20(14):2606-8.  
663 DOI: [10.1096/fj.06-6264fje](https://doi.org/10.1096/fj.06-6264fje). PMID: 17056760

664

665 28. Ballivet M, Alliod C, Bertrand S, Bertrand D. Nicotinic Acetylcholine Receptors in the  
666 Nematode *Caenorhabditis elegans*. J Mol Biol. 1996; 258(2):261-9. DOI:  
667 [10.1006/jmbi.1996.0248](https://doi.org/10.1006/jmbi.1996.0248). PMID: 8627624

668

669 29. Abongwa M, Buxton SK, Courtot E, Charvet CL, Neveu C, McCoy CJ, et al. Pharmacological  
670 profile of *Ascaris suum* ACR-16, a new homomeric nicotinic acetylcholine receptor widely  
671 distributed in *Ascaris* tissues. Br J Pharmacol. 2016; 173(16):2463-77. DOI:  
672 10.1111/bph.13524. PMID: 27238203

673

674 30. Raymond V, Mongan N., Sattelle D. Anthelmintic actions on homomer-forming nicotinic  
675 acetylcholine receptor subunits: chicken  $\alpha 7$  and ACR-16 from the nematode *Caenorhabditis*  
676 *elegans*. Neuroscience. 2000; 101(3):785-91. DOI: 10.1016/s0306-4522(00)00279-7. PMID:  
677 11113327

678

679 31. Mongan NP, Jones AK, Smith GR, Sansom MSP, Sattelle DB. Novel  $\alpha 7$ -like nicotinic  
680 acetylcholine receptor subunits in the nematode *Caenorhabditis elegans*. Protein Sci. 2002;  
681 11(5):1162-71. DOI: 10.1110/ps.3040102. PMID: 11967372

682

683 32. Bennett HM, Lees K, Harper KM, Jones AK, Sattelle DB, Wonnacott S, et al. *Xenopus laevis*  
684 RIC-3 enhances the functional expression of the *C. elegans* homomeric nicotinic receptor,  
685 ACR-16, in *Xenopus* oocytes. J Neurochem. 2012; 123(6):911-8. DOI: [10.1111/jnc.12013](https://doi.org/10.1111/jnc.12013).  
686 PMID: 2297069

687

- 688 33. Charvet CL, Guégnard F, Courtot E, Cortet J, Neveu C. Nicotine-sensitive acetylcholine  
689 receptors are relevant pharmacological targets for the control of multidrug resistant parasitic  
690 nematodes. *Int J Parasitol Drugs Drug Resist.* 2018; 8(3):540-549. DOI:  
691 [10.1016/j.ijpddr.2018.11.003](https://doi.org/10.1016/j.ijpddr.2018.11.003). PMID: 30502120  
692
- 693 34. Sleight JN. Functional analysis of nematode nicotinic receptors. *Biosci Horizons, Int J Stud*  
694 *Research.* 2010;3(1):29–39. doi:10.1093/biohorizons/hzq005  
695
- 696 35. Williamson SM, Walsh TK, Wolstenholme AJ. The cys-loop ligand-gated ion channel gene  
697 family of *Brugia malayi* and *Trichinella spiralis*: A comparison with *Caenorhabditis elegans*.  
698 *Invertebr Neurosci.* 2007; 7(4):219-26. DOI: 10.1007/s10158-007-0056-0. PMID: 17952476  
699
- 700 36. Dale VME, Martin RJ. Oxantel-activated single channel currents in the muscle membrane of  
701 *Ascaris suum*. *Parasitology.* 1995; 110 ( Pt 4):437-48. DOI: [10.1017/s0031182000064775](https://doi.org/10.1017/s0031182000064775).  
702 PMID: 7538657  
703
- 704 37. Robertson SJ, Pennington AJ, Mark Evans A, Martin RJ. The action of pyrantel as an agonist  
705 and an open channel blocker at acetylcholine receptors in isolated *Ascaris suum* muscle vesicles.  
706 *Eur J Pharmacol.* 1994; 271(2-3):273-82. DOI: 10.1016/0014-2999(94)90784-6. PMID:  
707 7535704  
708
- 709 38. Touroutine D, Fox RM, Stetina SE von, Burdina A, Miller DM, III, et al. acr-16 Encodes an  
710 essential subunit of the levamisole-resistant nicotinic receptor at the *Caenorhabditis elegans*

- 711 neuromuscular junction. J Biol Chem. 2005; 280(29):27013-21. DOI:  
712 [10.1074/jbc.M502818200](https://doi.org/10.1074/jbc.M502818200). PMID: 15917232  
713
- 714 39. Hansen CP, Jensen AA, Christensen JK, Balle T, Liljefors T, Frølund B. Novel acetylcholine  
715 and carbamoylcholine analogues: Development of a functionally selective  $\alpha 4\beta 2$  nicotinic  
716 acetylcholine receptor agonist. J Med Chem. 2008; 51(23):7380-95. DOI: [10.1021/jm701625v](https://doi.org/10.1021/jm701625v).  
717 PMID: 18989912  
718
- 719 40. Hansen TVA, Williams AR, Denwood M, Nejsum P, Thamsborg SM, Friis C. Pathway of  
720 oxfendazole from the host into the worm: *Trichuris suis* in pigs. Int J Parasitol Drugs Drug  
721 Resist. 2017; 7(3):416-424. DOI: [10.1016/j.ijpddr.2017.11.002](https://doi.org/10.1016/j.ijpddr.2017.11.002). PMID: 29156431  
722
- 723 41. Altschul SF, Madden TL, Sch+ñffer AA, Zhang J, Zhang Z, Miller W, et al. Gapped BLAST  
724 and PSI-BLAST: a new generation of protein database search programs. Nucleic Acids Res.  
725 1997; 25(17):3389-402. DOI: [10.1093/nar/25.17.3389](https://doi.org/10.1093/nar/25.17.3389). PMID: 9254694  
726
- 727 42. Petersen TN, Brunak S, Von Heijne G, Nielsen H. SignalP 4.0: Discriminating signal peptides  
728 from transmembrane regions. Nat Methods. 2011; 8(10):785-6. DOI: [10.1038/nmeth.1701](https://doi.org/10.1038/nmeth.1701).  
729 PMID: 21959131  
730
- 731 43. Krogh A, Larsson B, Von Heijne G, Sonnhammer ELL. Predicting transmembrane protein  
732 topology with a hidden Markov model: Application to complete genomes. J Mol Biol. 2001;  
733 305(3):567-80. DOI: [10.1006/jmbi.2000.4315](https://doi.org/10.1006/jmbi.2000.4315). PMID: 11152613  
734



- 735 44. Jespersen T, Grunnet M, Angelo K, Klærke DA, Olesen S-P. Dual-function vector for protein  
736 expression in both mammalian cells and *Xenopus laevis* oocytes. *Biotechniques*. 2002;  
737 32(3):536-8. DOI: [10.2144/02323st05](https://doi.org/10.2144/02323st05). PMID: 11911656

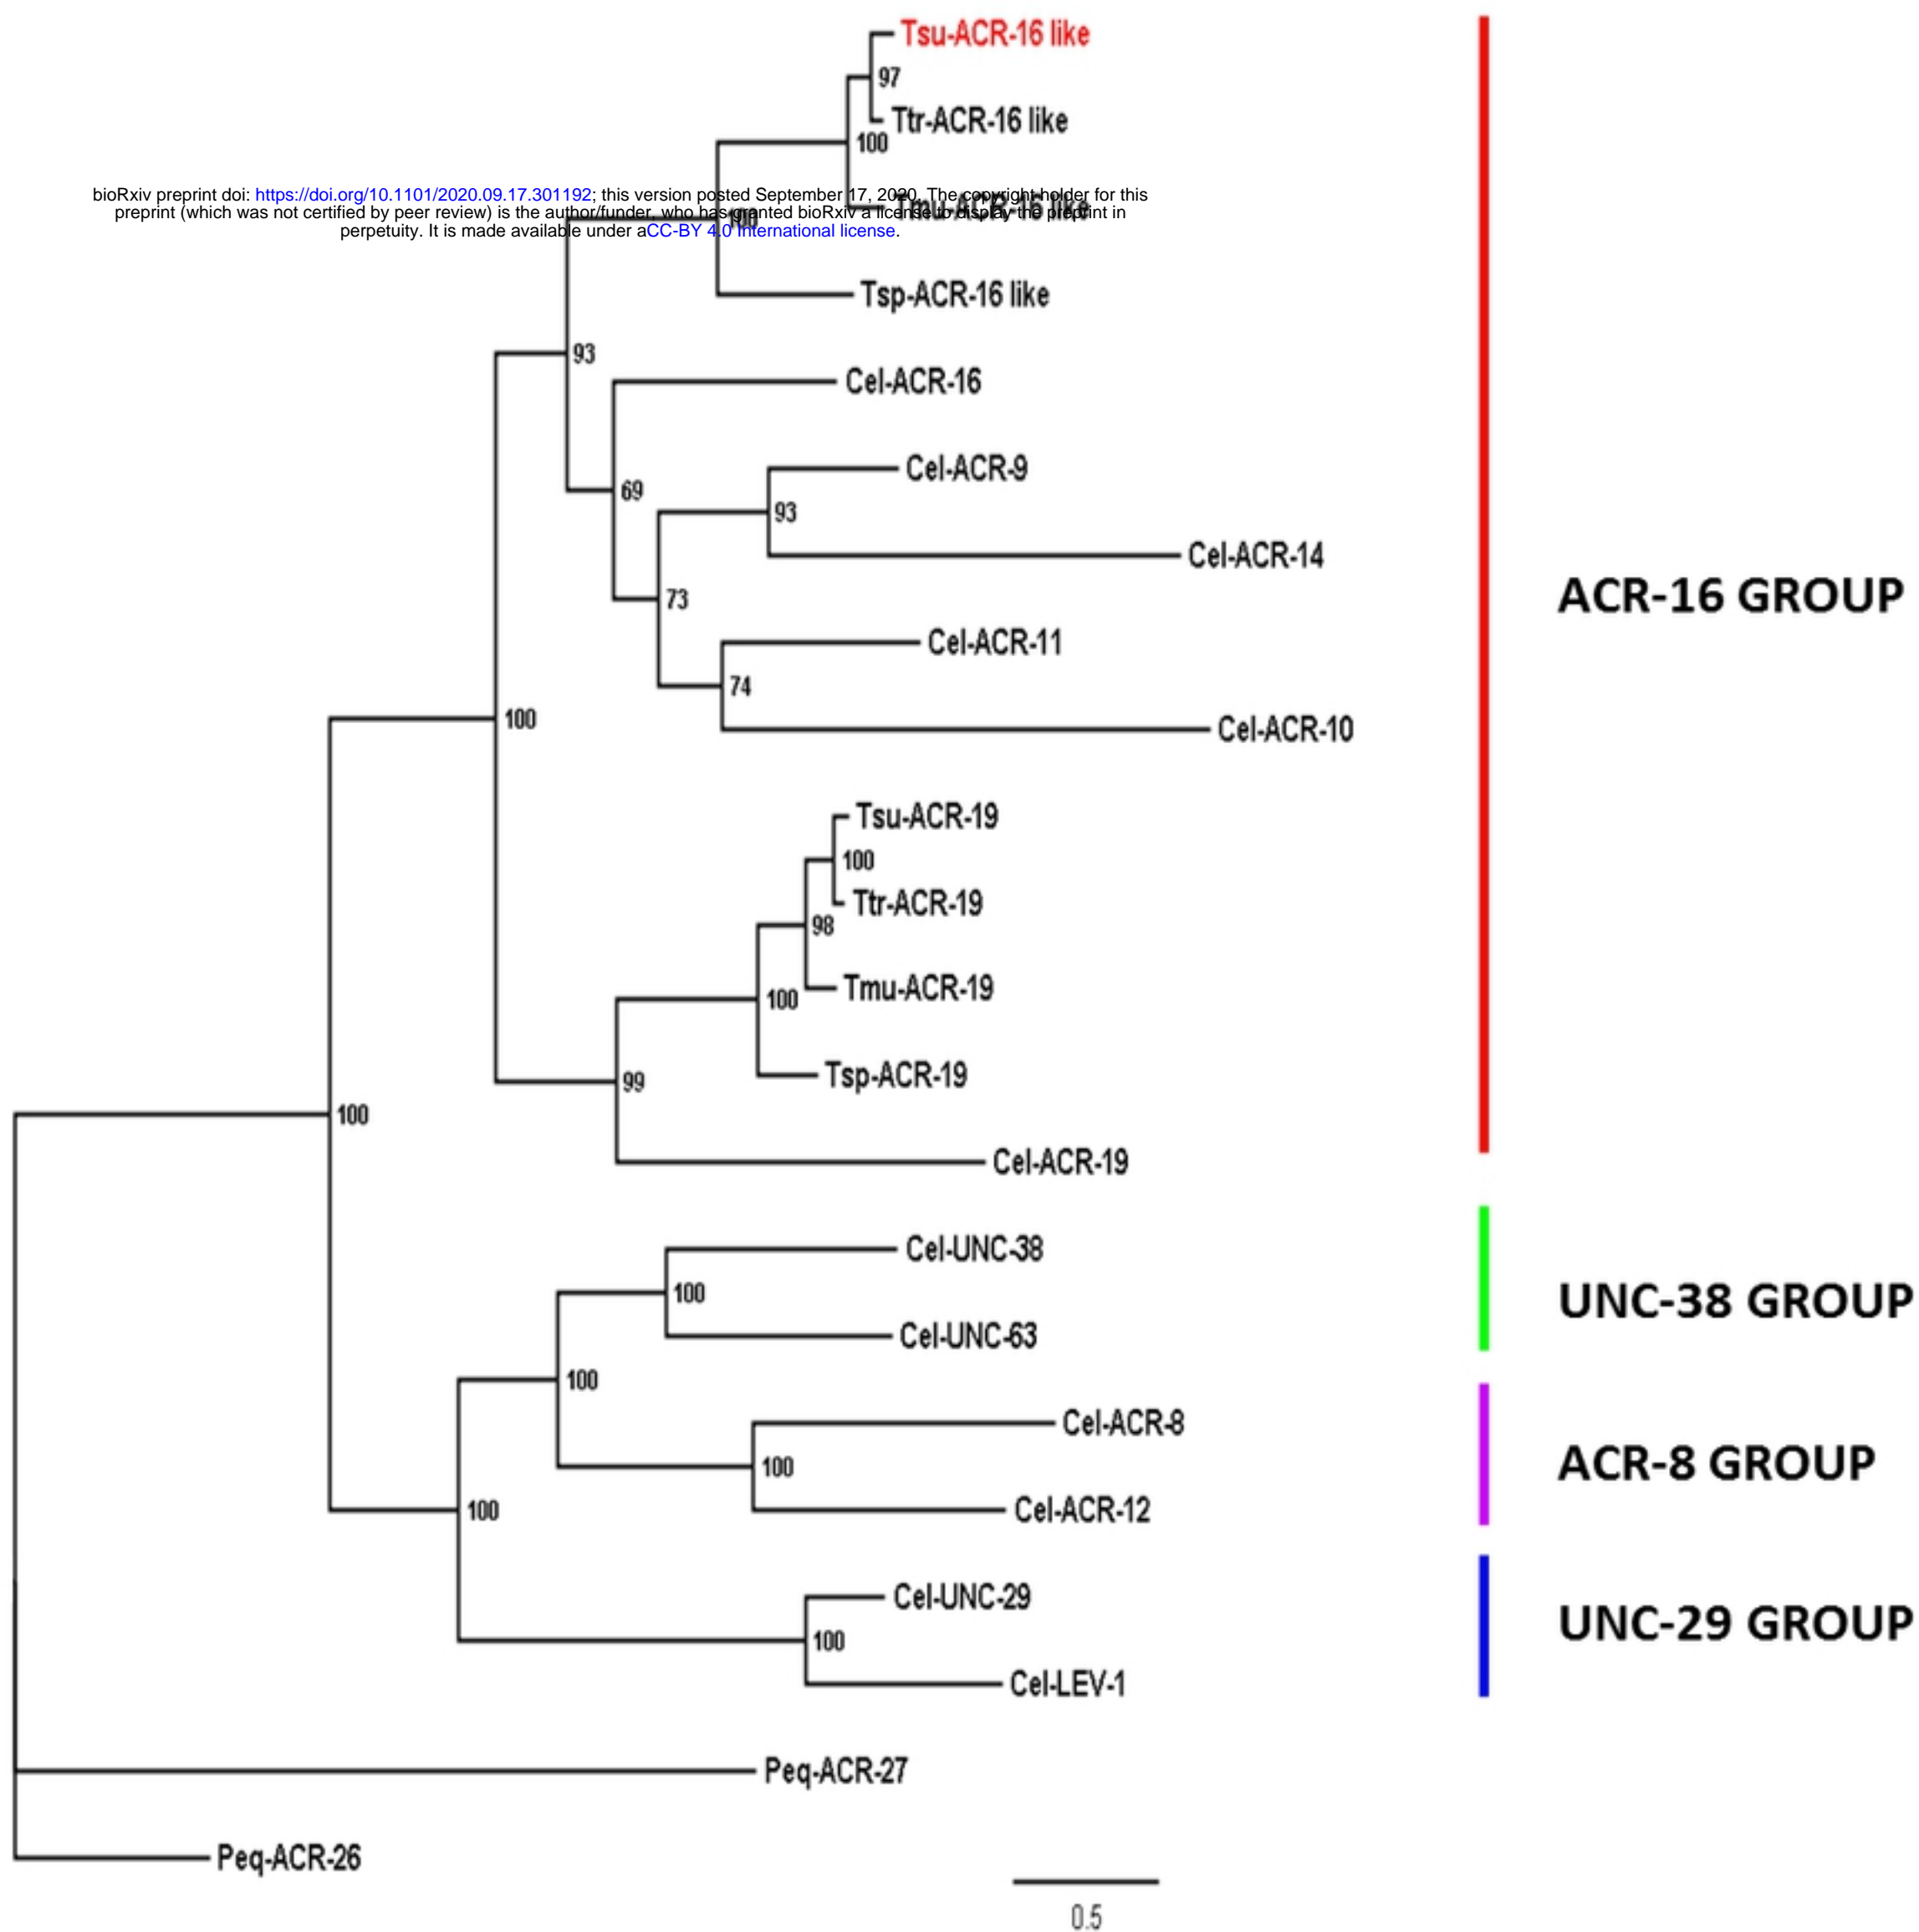

Figure

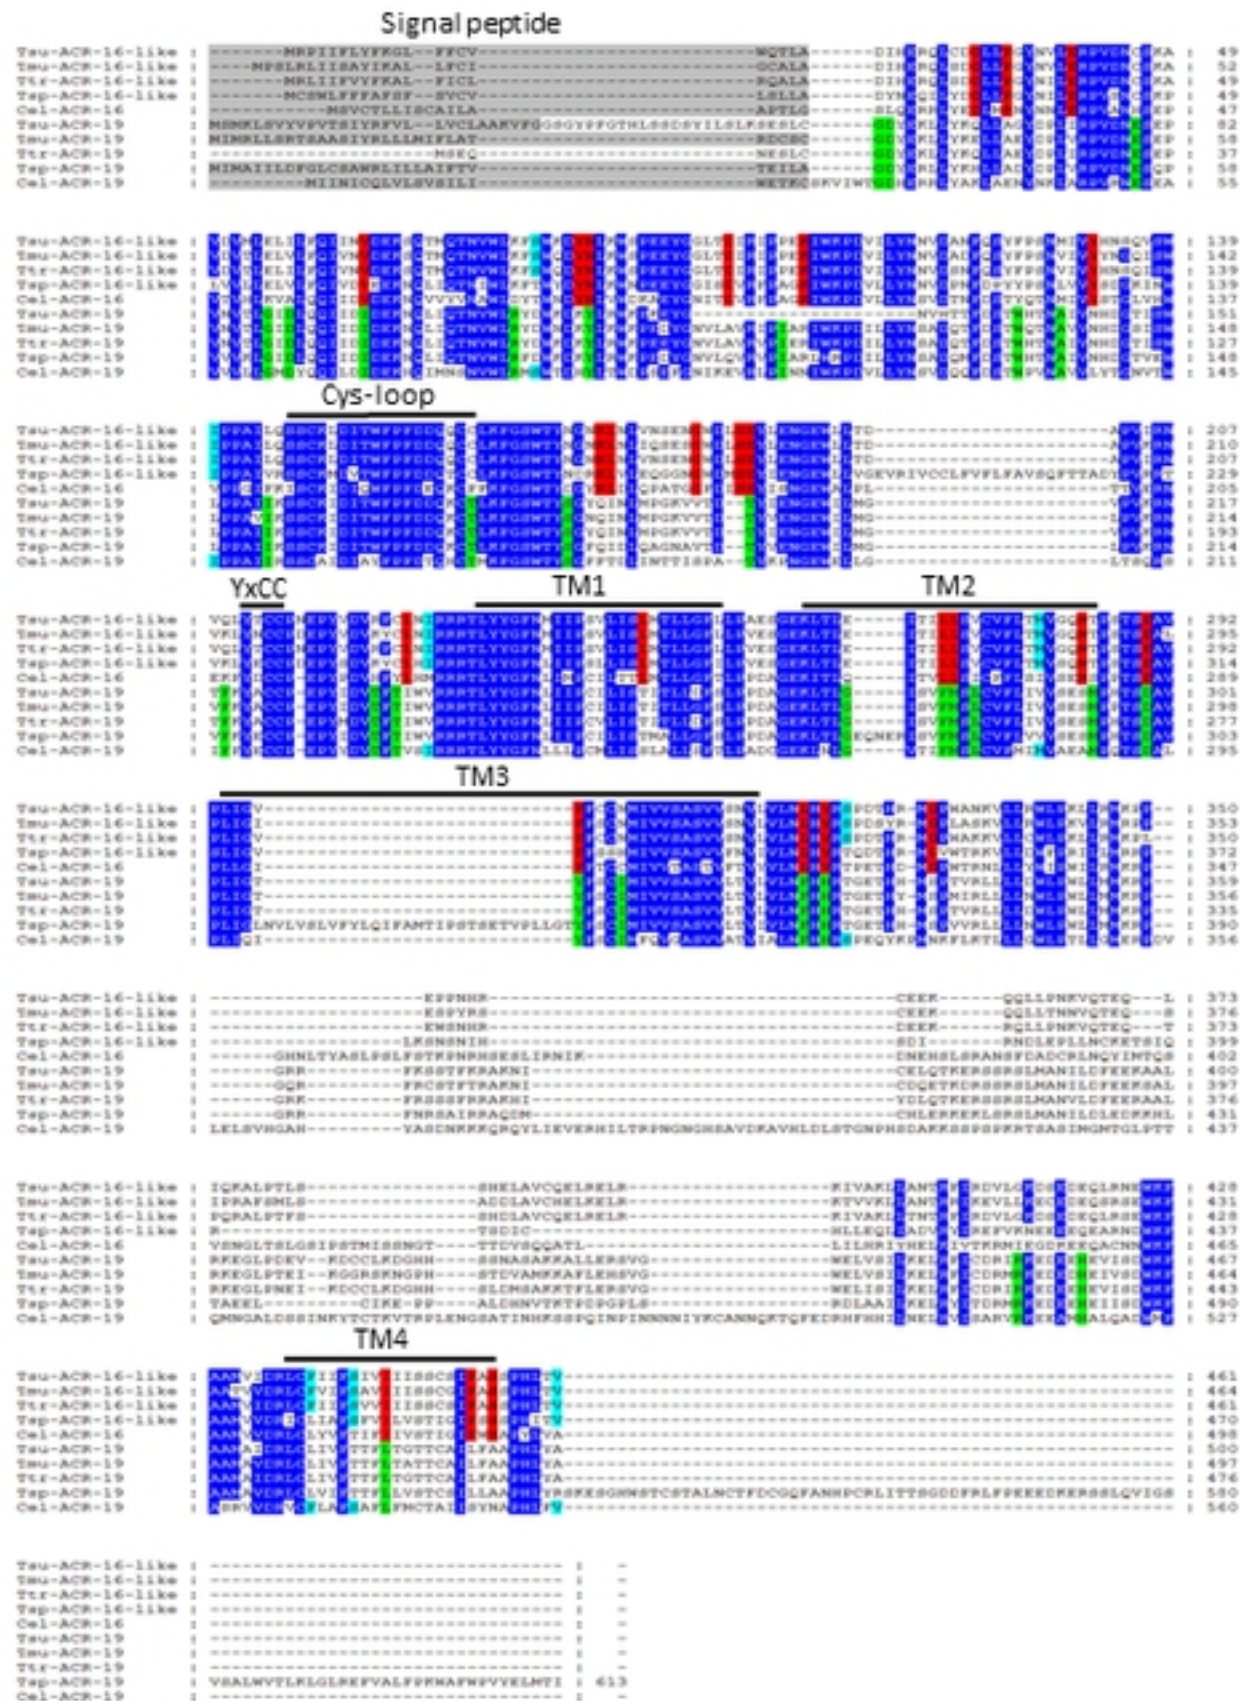

Figure

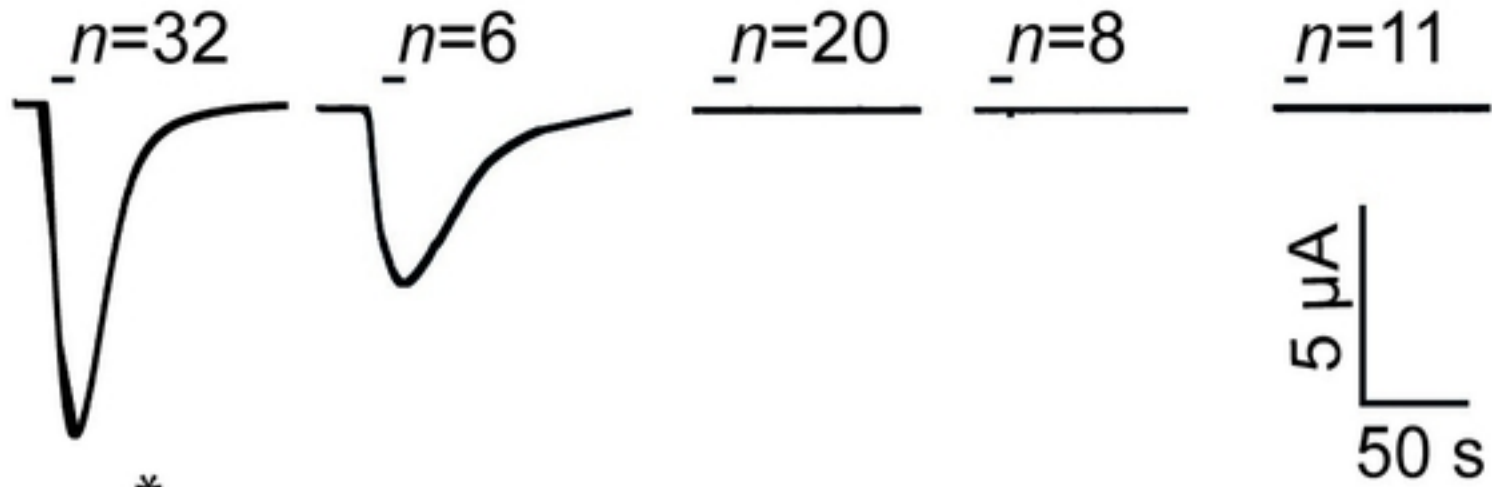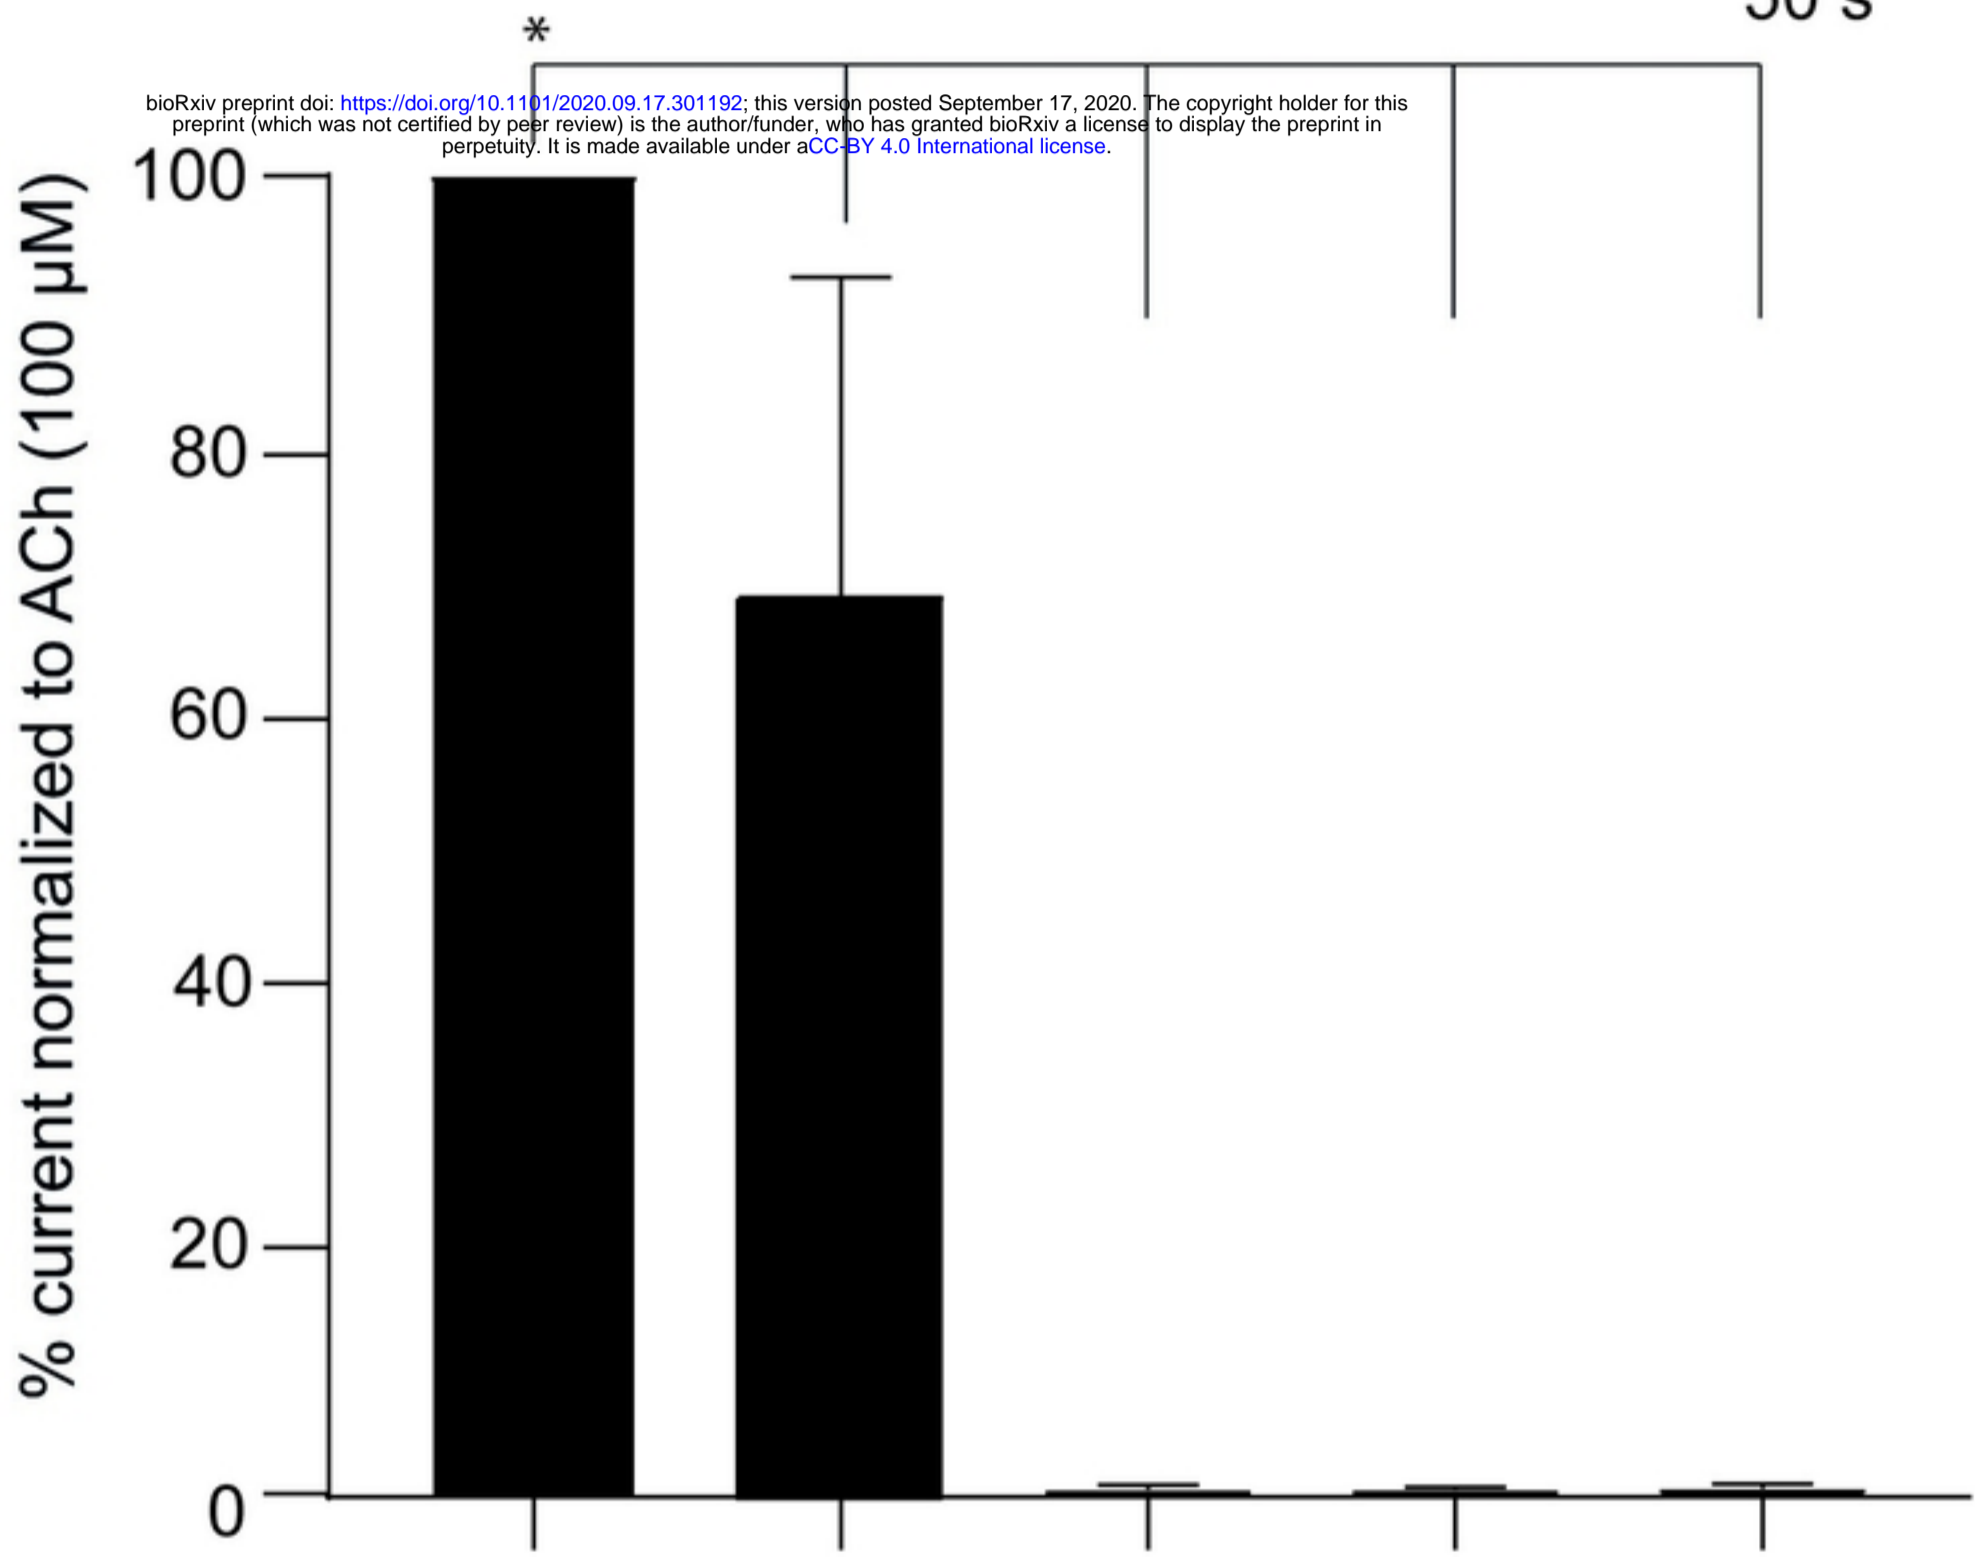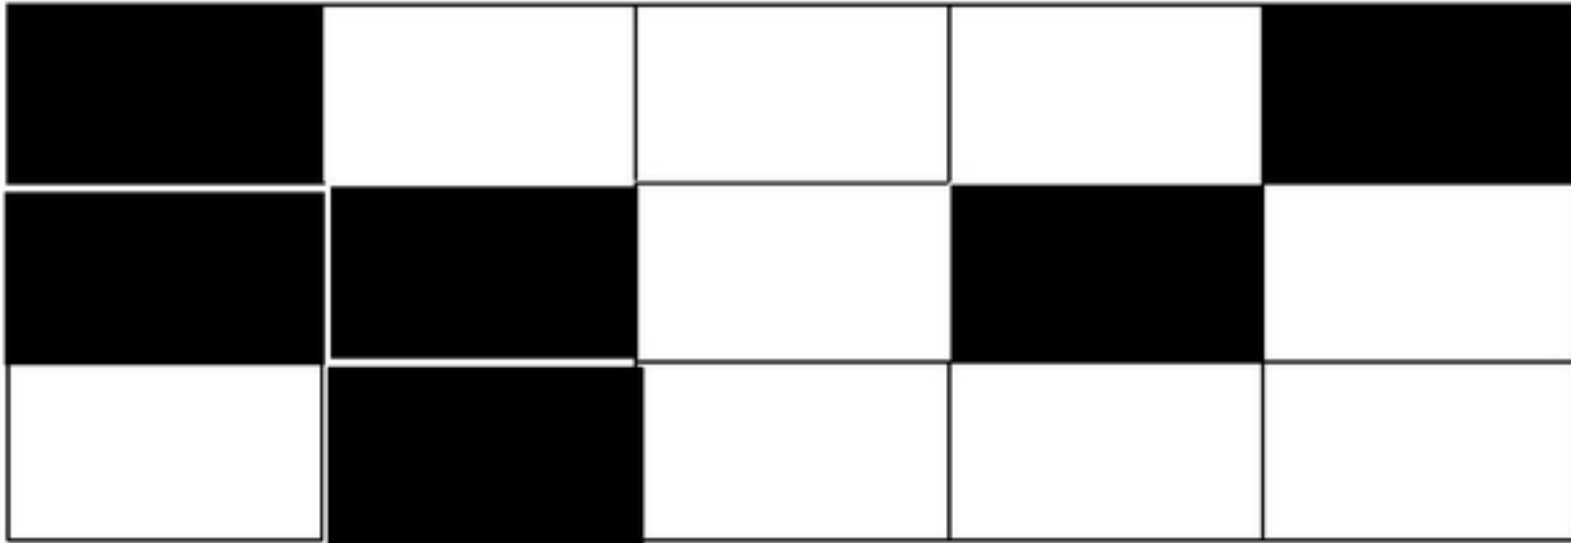

*Asu-ric-3*

*Tsu- acr-16-like*

*Xle- ric-3*

Figure

ACh (100  $\mu$ M)

*n*=23

*n*=16

*n*=15

*n*=16

*n*=15

*n*=16

*n*=17

*n*=17

*n*=15

bioRxiv preprint doi: <https://doi.org/10.1101/2020.09.17.301192>; this version posted September 17, 2020. The copyright holder for this preprint (which was not certified by peer review) is the author/funder, who has granted bioRxiv a license to display the preprint in perpetuity. It is made available under aCC-BY 4.0 International license.

5  $\mu$ A  
100 s

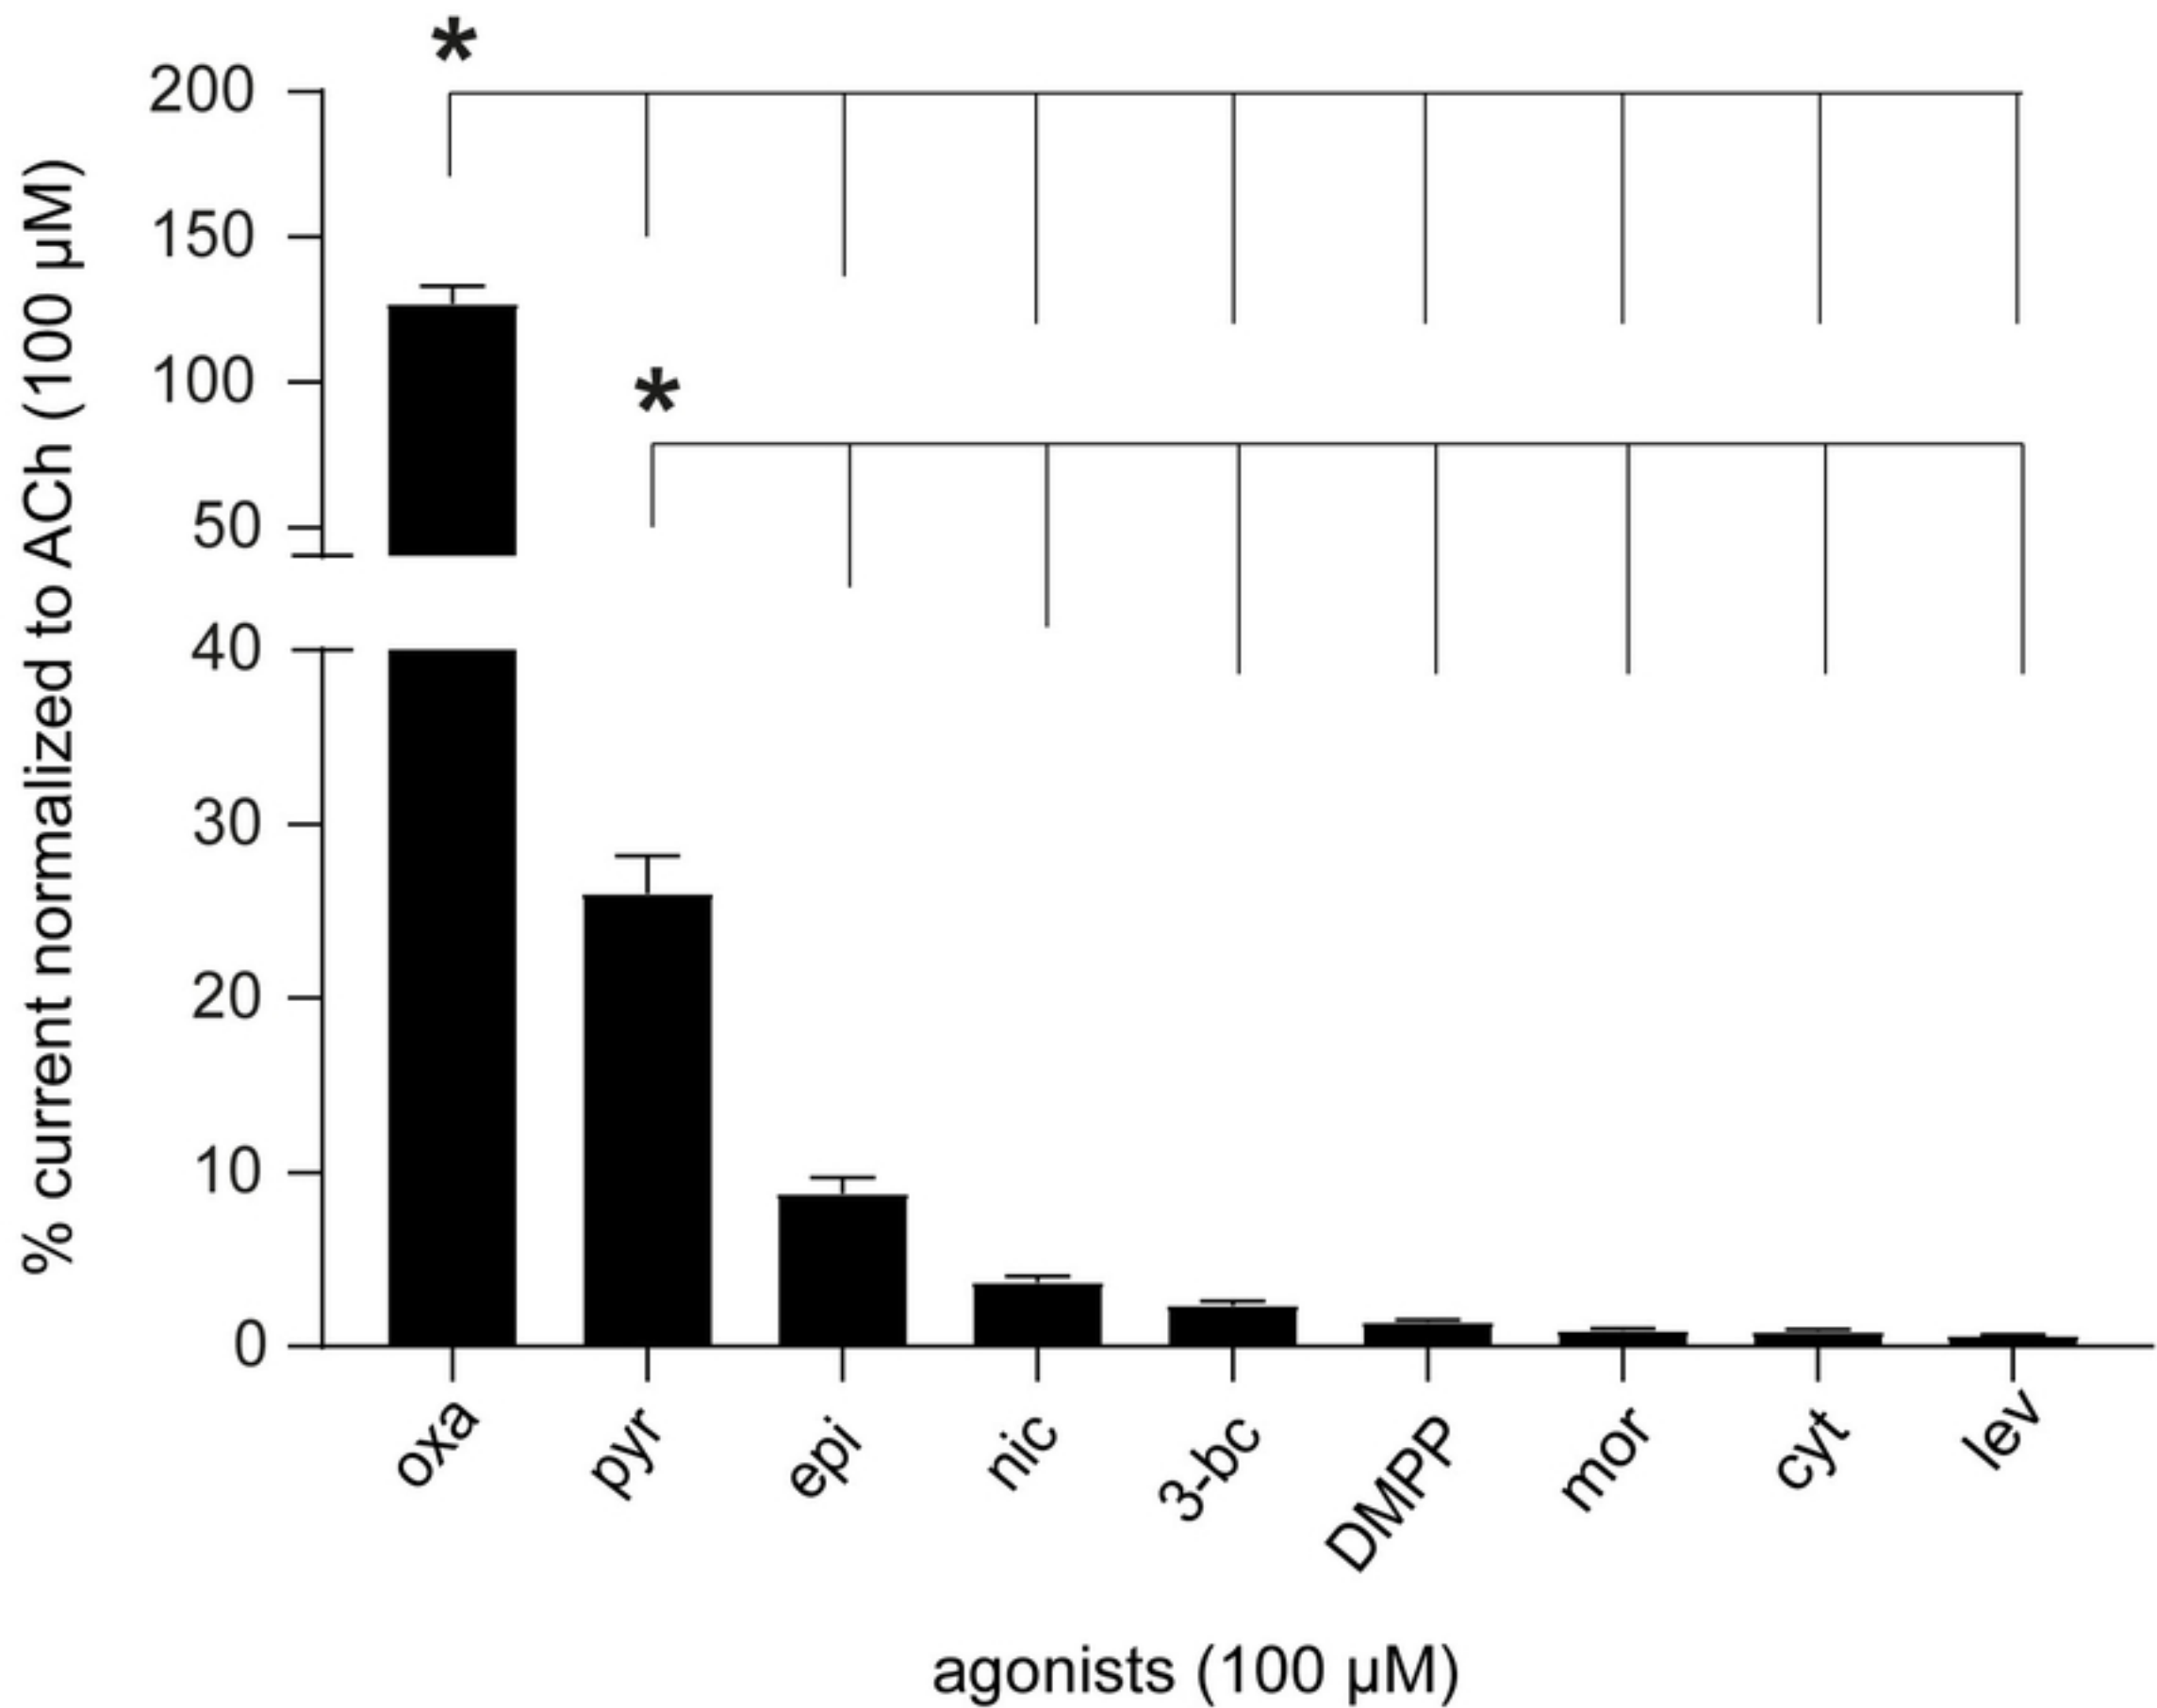

Figure

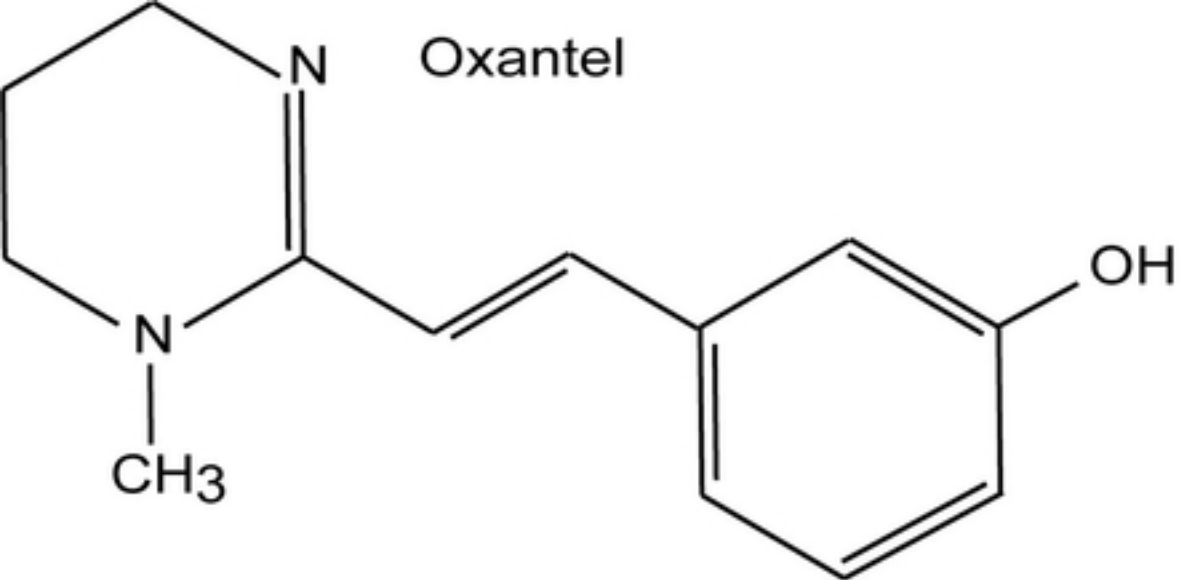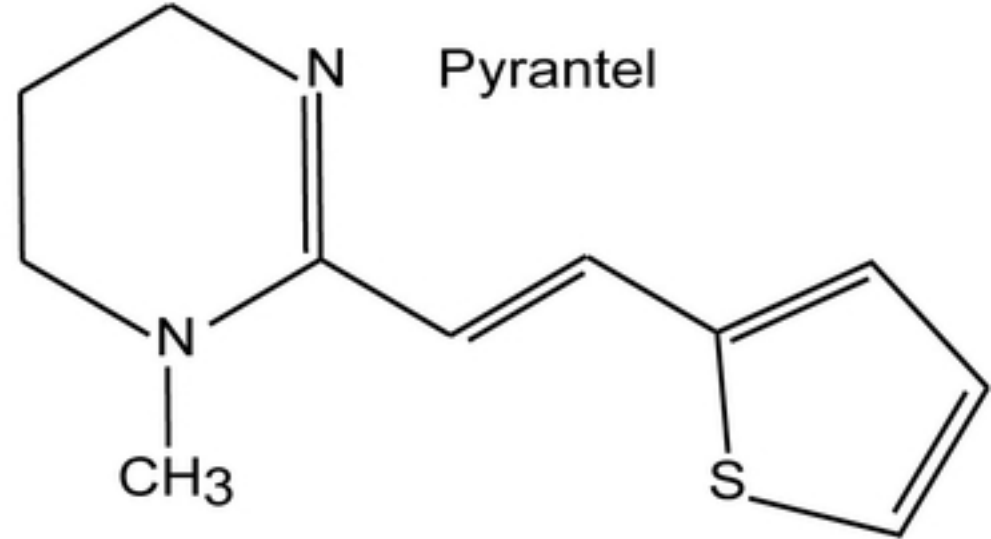

Figure

ACh (300  $\mu$ M)

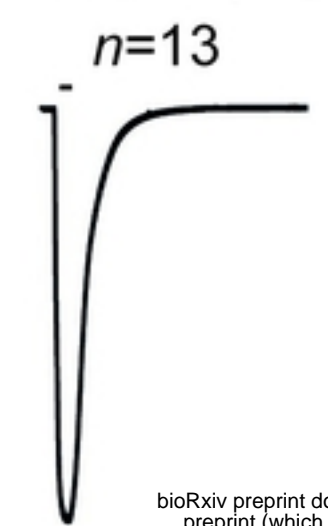

oxantel

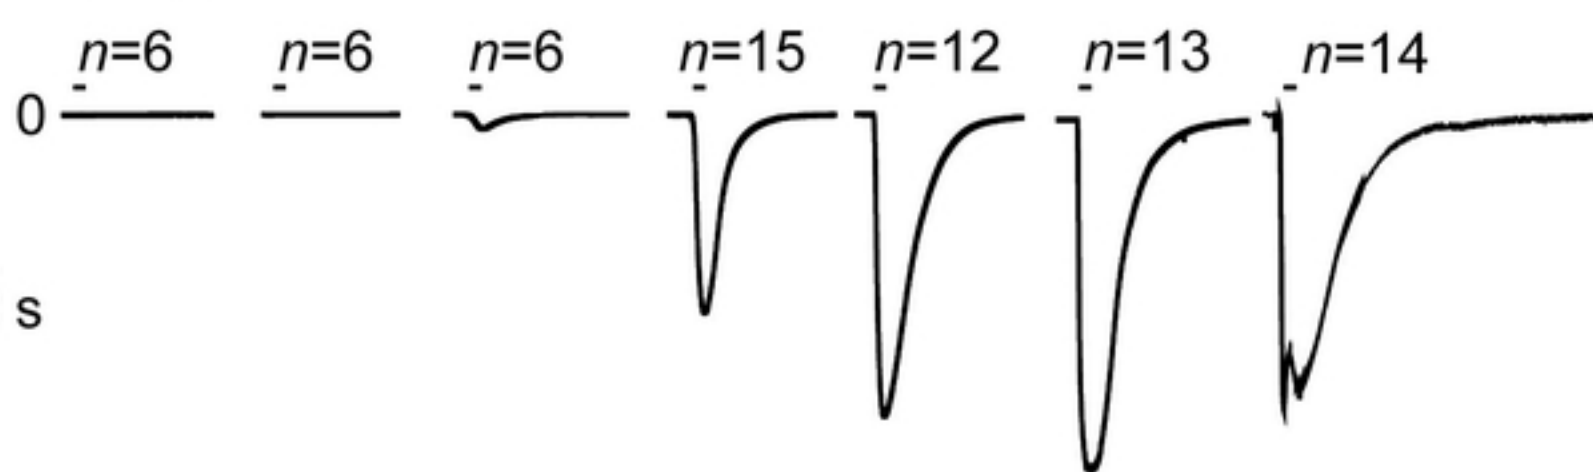

bioRxiv preprint doi: <https://doi.org/10.1101/2020.09.17.301192>; this version posted September 17, 2020. The copyright holder for this preprint (which was not certified by peer review) is the author/funder, who has granted bioRxiv a license to display the preprint in perpetuity. It is made available under aCC-BY 4.0 International license.

ACh (300  $\mu$ M)

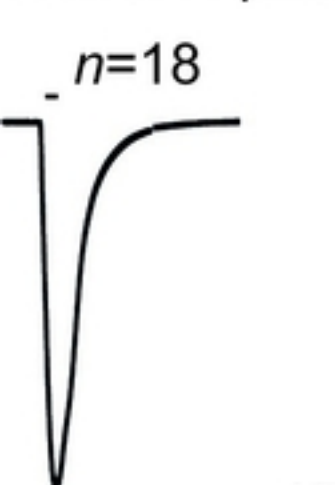

pyrantel

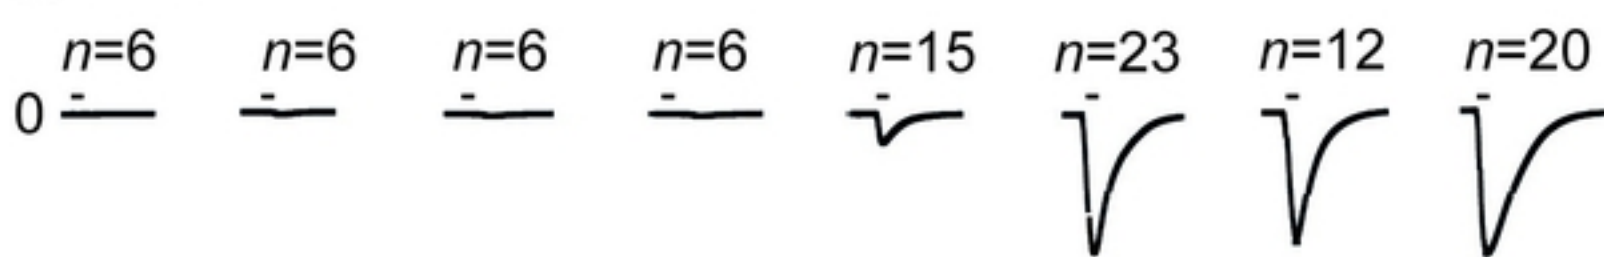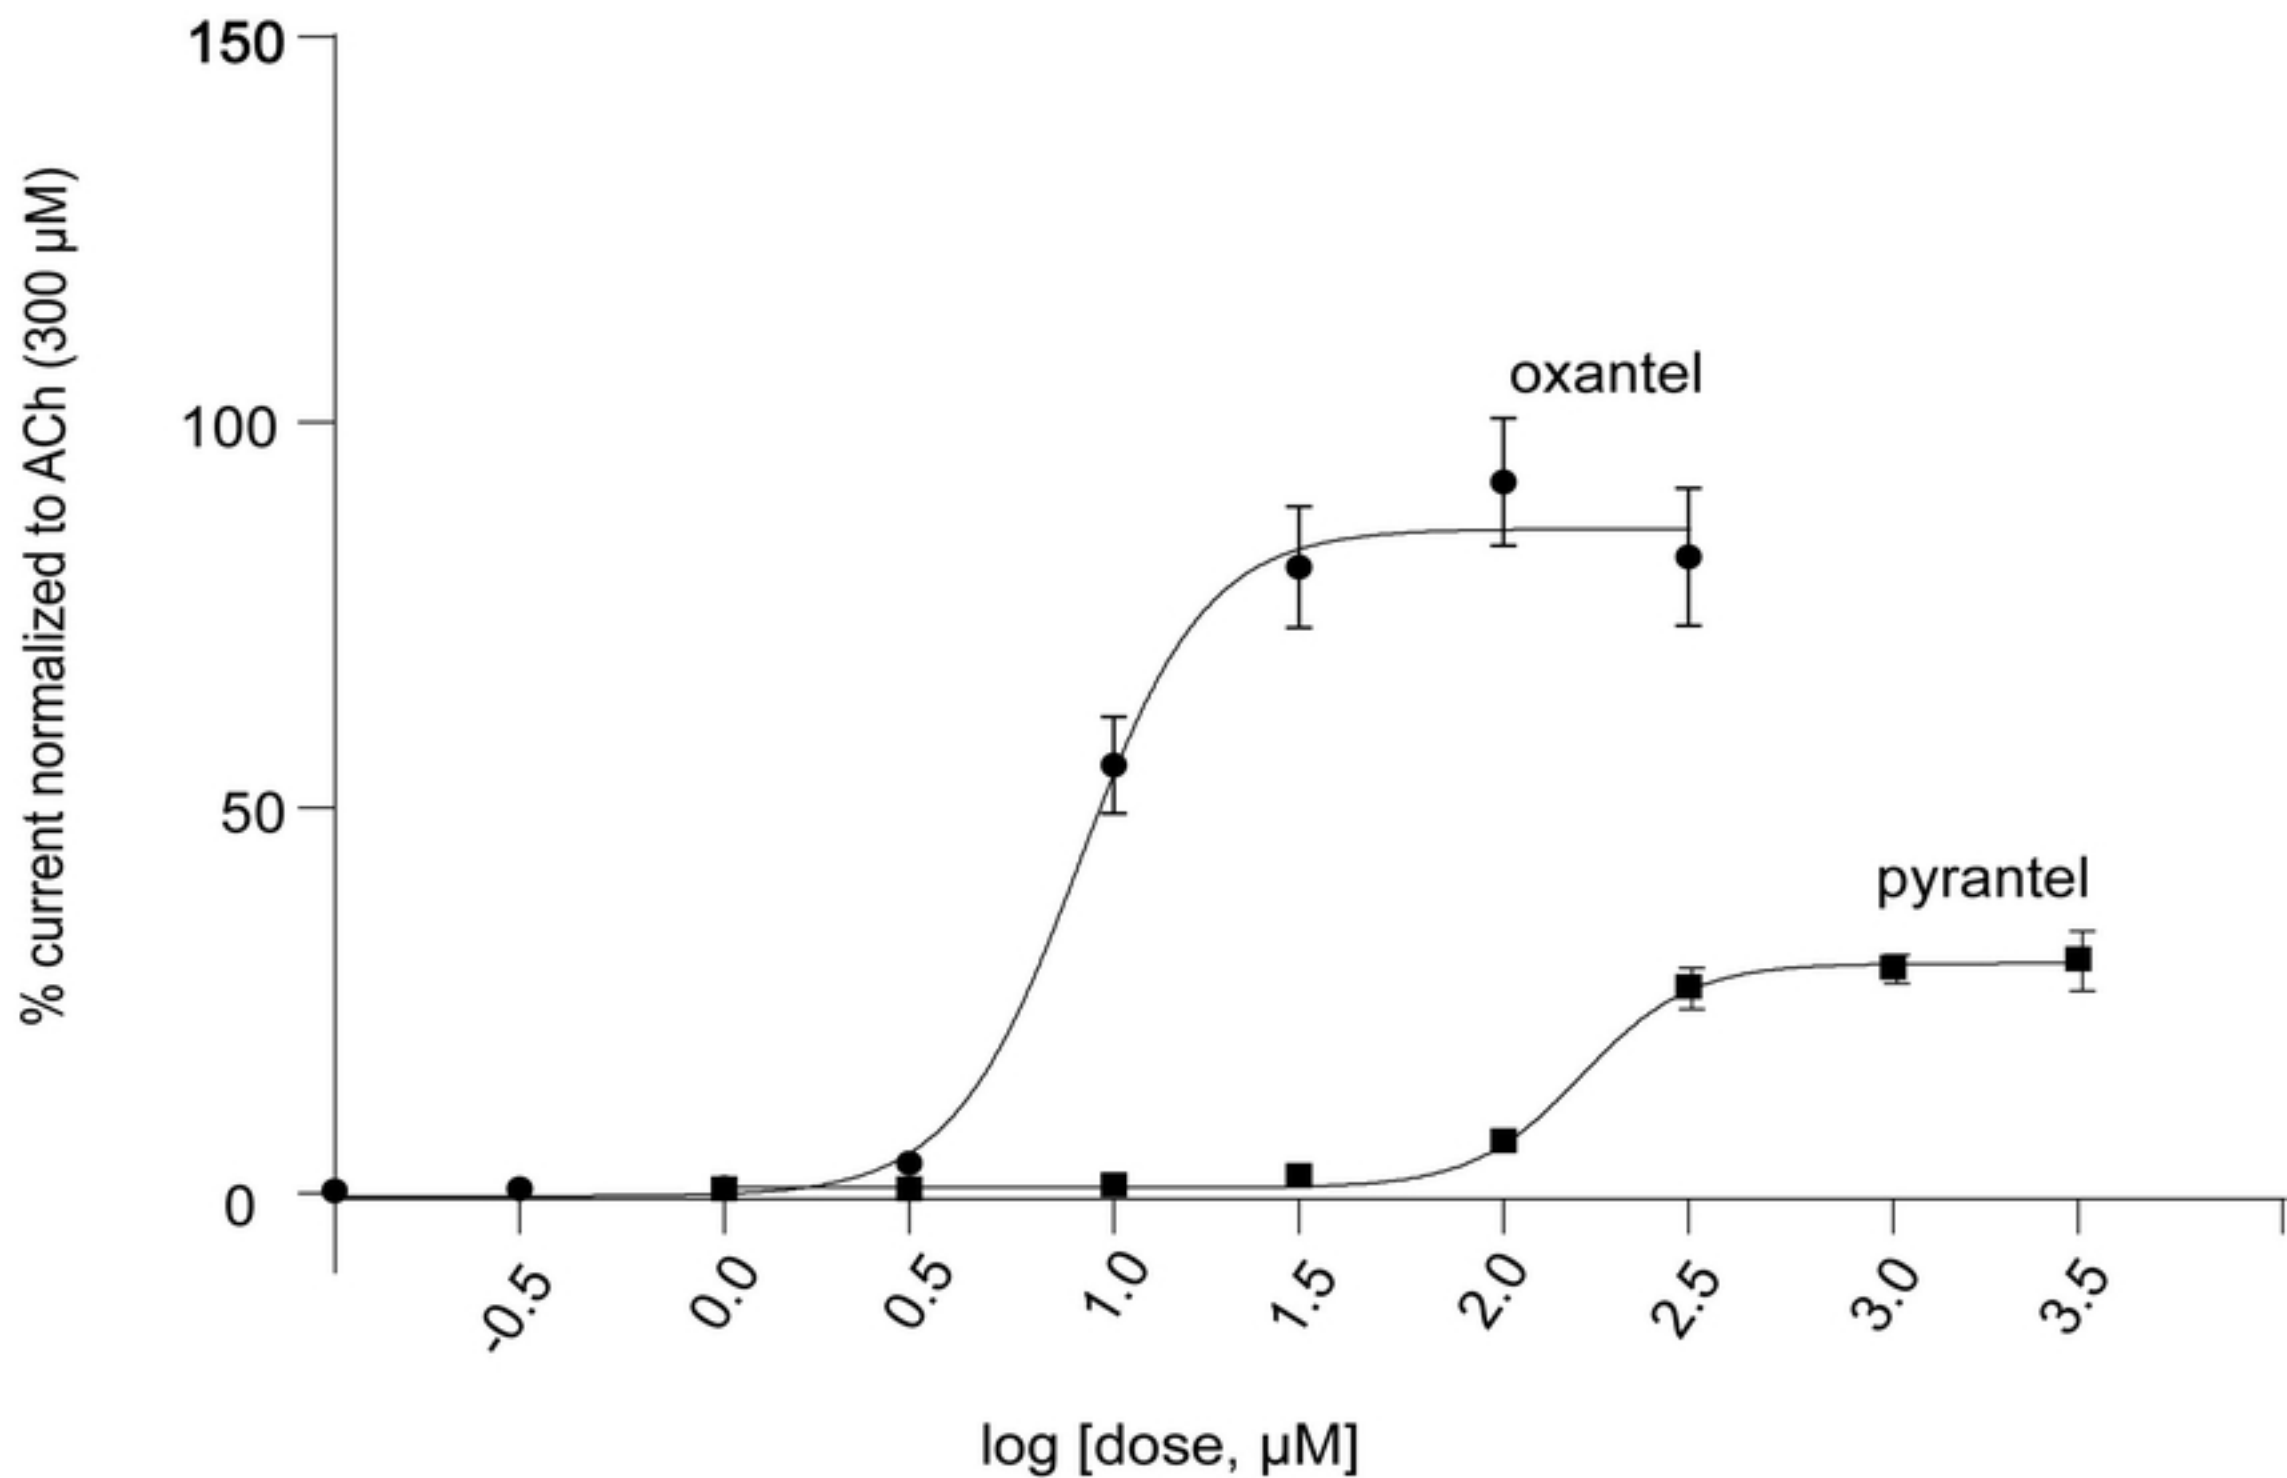

Figure

bioRxiv preprint doi: <https://doi.org/10.1101/2020.09.17.301192>; this version posted September 17, 2020. The copyright holder for this preprint (which was not certified by peer review) is the author/funder, who has granted bioRxiv a license to display the preprint in perpetuity. It is made available under aCC-BY 4.0 International license.

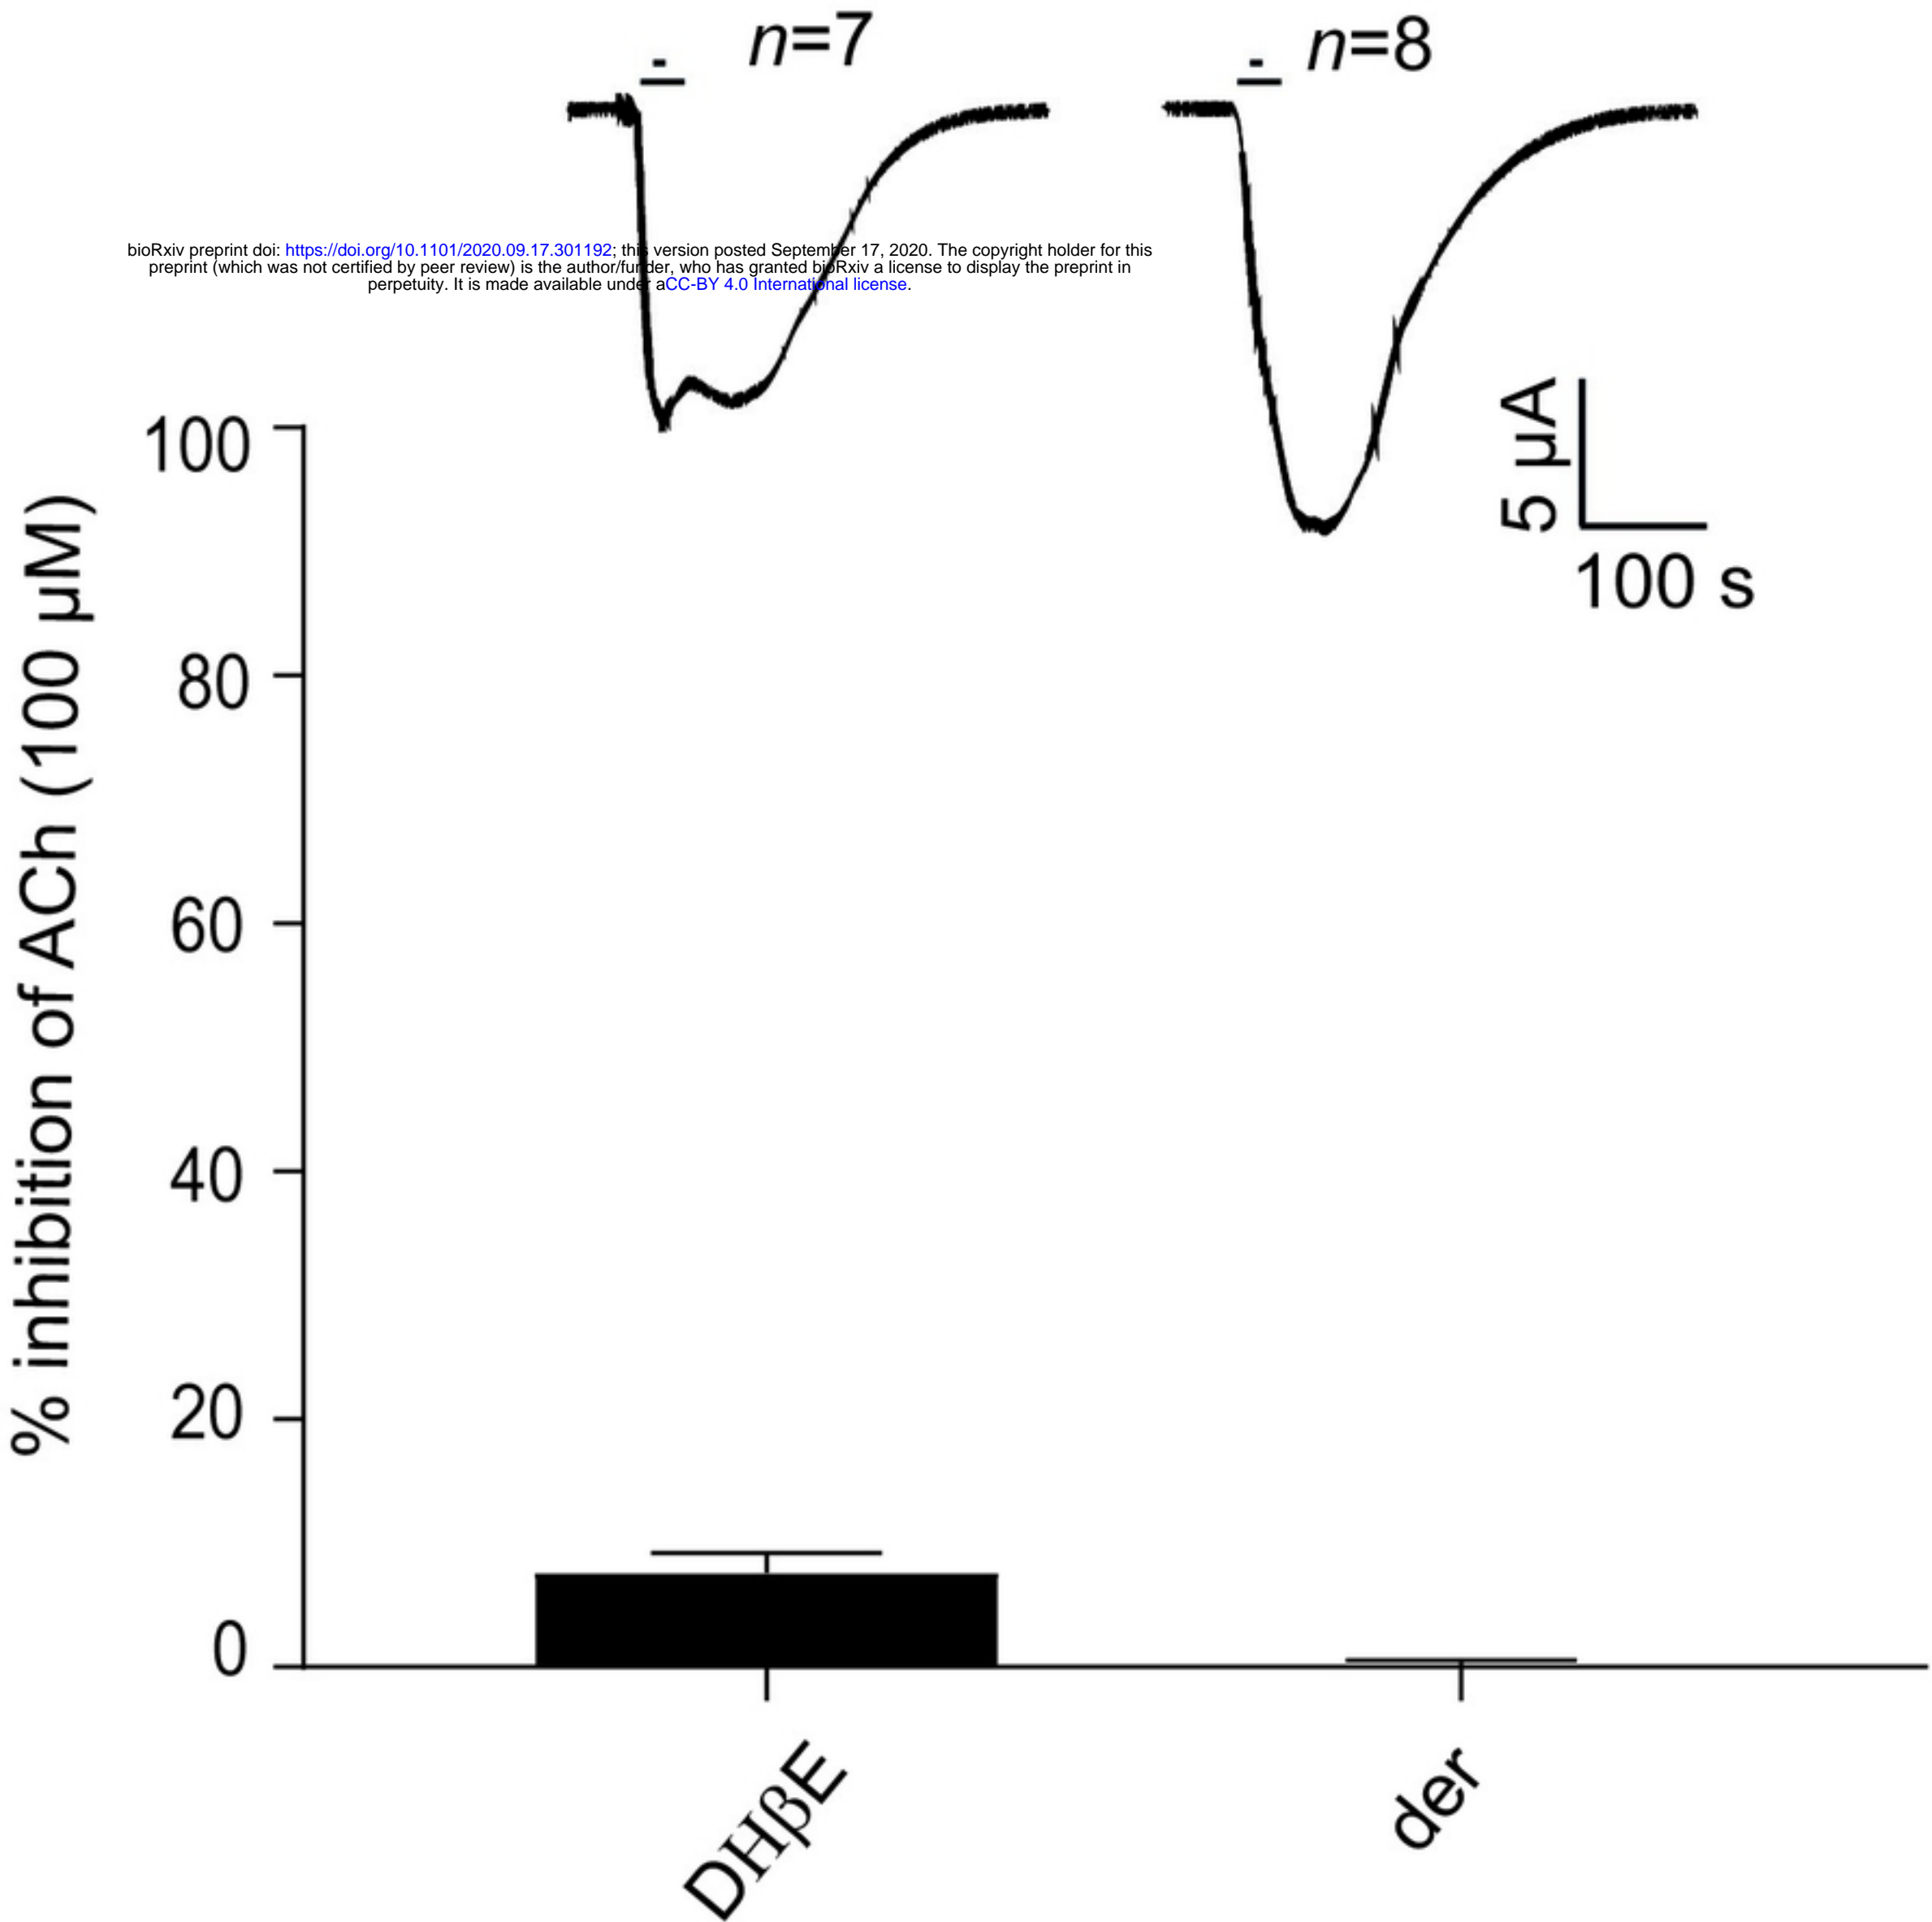

Figure



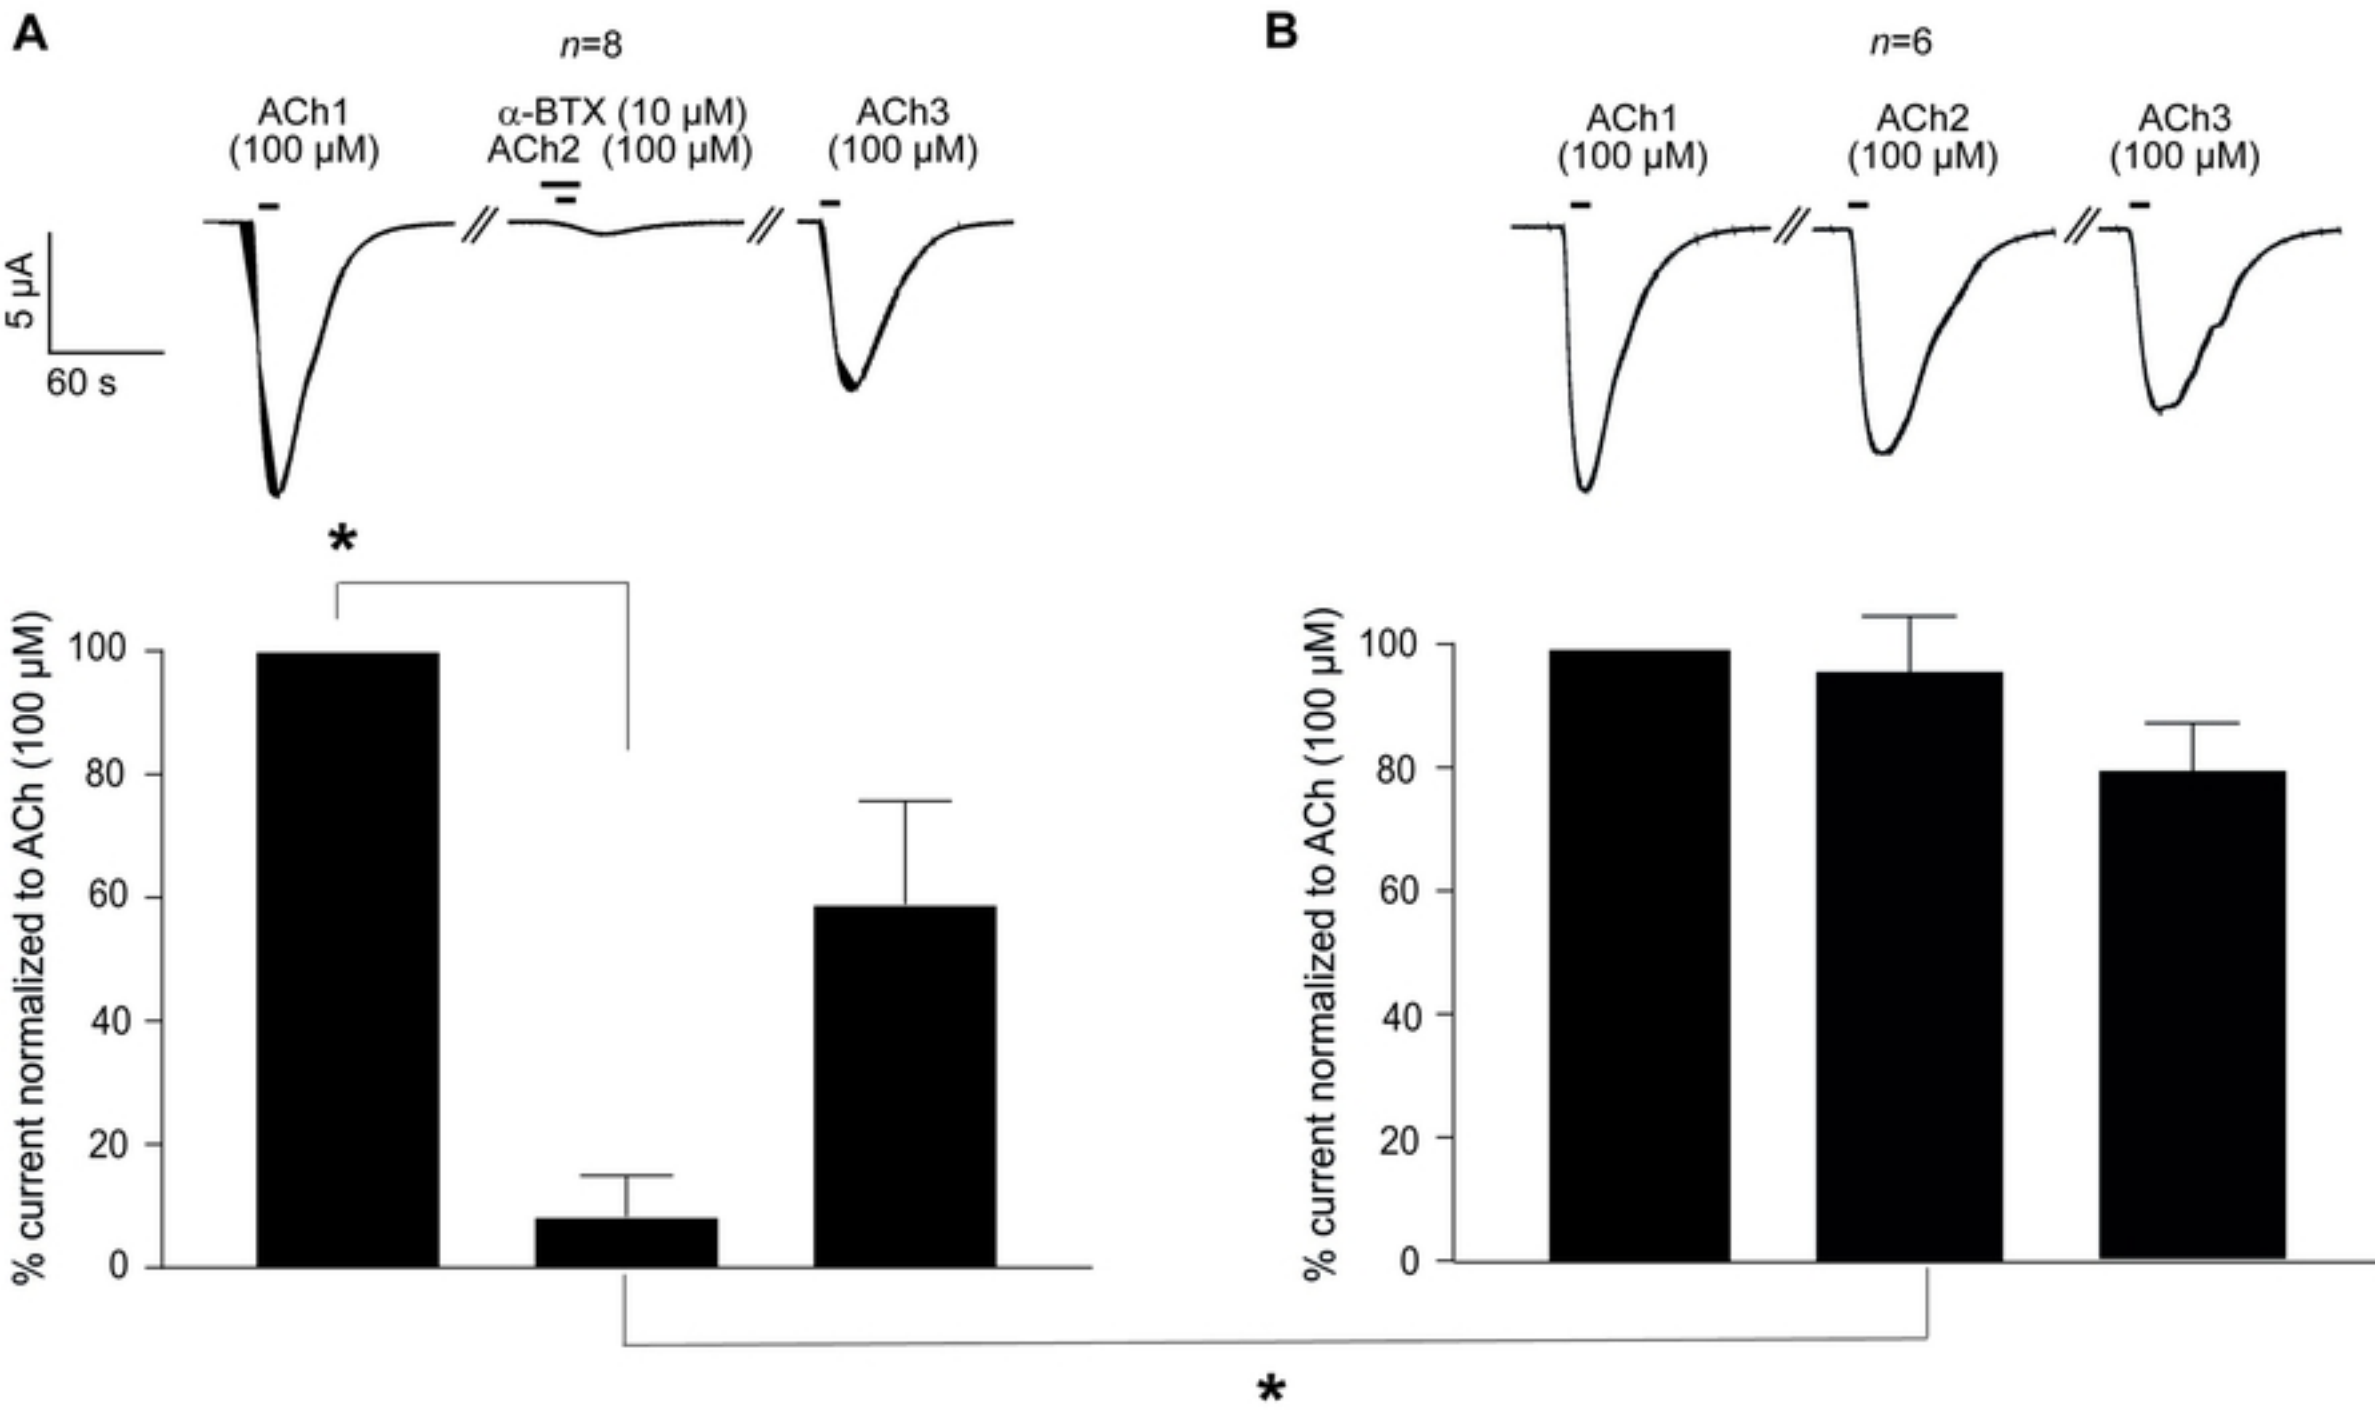

Figure
